# Supplementary material for: Sex-specific non-linear DNA methylation trajectories across aging predict cancer risk and systemic inflammation
Source: bioRxiv preprint, doi:10.1101/2025.08.19.671184, version 1 (2025-08-20)
Supplement: Supplementary Table 1 [file 671184_file03.xlsx]

## Sheet: Females
CpG	Baseline	Model7	Model12
cg00000029	NC	NC	NC
cg00000109	NC	NC	NC
cg00000155	NC	NC	NC
cg00000158	NC	NC	NC
cg00000292	NC	NC	NC
cg00000321	NC	NC	NC
cg00000363	NC	NC	NC
cg00000540	LD	NC	NC
cg00000579	NC	NC	NC
cg00000596	NC	NC	NC
cg00000622	NC	NC	NC
cg00000658	NC	NC	NC
cg00000714	NC	NC	NC
cg00000765	NC	NC	NC
cg00000769	NC	NC	NC
cg00000905	NC	NC	NC
cg00000948	NC	NC	NC
cg00000957	NC	NC	NC
cg00000974	NC	NC	NC
cg00001099	NC	NC	NC
cg00001136	NC	NC	NC
cg00001245	NC	NC	NC
cg00001249	NC	NC	NC
cg00001269	NC	NC	NC
cg00001364	NC	NC	NC
cg00001446	NC	NC	NC
cg00001503	NC	NC	NC
cg00001506	NC	NC	NC
cg00001510	NC	NC	NC
cg00001534	NC	NC	NC
cg00001582	NC	NC	NC
cg00001583	LI	LI	LI
cg00001594	NC	NC	NC
cg00001610	NC	NC	NC
cg00001636	NC	NC	NC
cg00001687	NC	NC	NC
cg00001747	NC	NC	NC
cg00001755	NC	NC	NC
cg00001784	NC	NC	NC
cg00001791	NC	NC	NC
cg00001809	NC	NC	NC
cg00001814	NC	NC	NC
cg00001854	NC	NC	NC
cg00001874	NC	NC	NC
cg00001930	NC	NC	NC
cg00001997	NC	NC	NC
cg00002028	NC	NC	NC
cg00002033	NL	NC	NC
cg00002080	NC	NC	NC
cg00002116	NC	NC	NC
cg00002145	NC	NC	NC
cg00002176	NC	NC	NC
cg00002186	NC	NL	NC
cg00002190	NC	NC	NC
cg00002224	NC	NC	NC
cg00002236	NC	NC	NC
cg00002350	NC	NC	NC
cg00002366	NC	NC	NC
cg00002398	NC	NC	NC
cg00002406	NC	NC	NC
cg00002426	NC	NC	NC
cg00002444	NC	NC	NC
cg00002449	NC	NC	NC
cg00002464	NC	NC	NC
cg00002490	NC	NC	NC
cg00002531	NC	NC	NC
cg00002559	NC	NC	NC
cg00002591	NC	NC	NC
cg00002593	NC	NC	NC
cg00002646	NC	NC	NC
cg00002660	NC	NC	NC
cg00002684	LD	LD	NL
cg00002719	NC	NC	NC
cg00002769	NC	NC	NC
cg00002776	NC	NC	NC
cg00002780	NC	NC	NC
cg00002808	NC	NC	NC
cg00002809	NC	NC	NC
cg00002810	NC	NC	NC
cg00002837	NC	NC	NC
cg00002907	NC	NC	NC
cg00002934	NC	NC	NC
cg00003009	NC	NC	NC
cg00003014	NC	NC	NC
cg00003036	LI	LI	NC
cg00003091	NC	NC	NC
cg00003167	NC	NC	NC
cg00003202	NC	NC	NC
cg00003287	NC	NC	NC
cg00003298	NC	NC	NC
cg00003345	NL	NL	NL
cg00003407	NC	NC	NC
cg00003513	NC	NC	NC
cg00003555	NC	NC	NC
cg00003578	NC	NC	NC
cg00003625	NC	NC	NC
cg00003722	NC	NC	NC
cg00003758	NC	NC	NC
cg00003784	NC	NC	NC
cg00003858	NC	NC	NC
cg00003911	NC	NC	NC
cg00003937	NC	NC	NC
cg00003944	NC	NC	NC
cg00003965	NC	NC	NC
cg00003994	NC	NC	NC
cg00004055	NC	NC	NC
cg00004067	NC	NC	NC
cg00004072	NC	NC	NC
cg00004082	NC	NC	NC
cg00004089	NC	NC	NC
cg00004105	VI	LD	NC
cg00004175	NC	NC	NC
cg00004207	NC	NC	NC
cg00004255	NC	NC	NC
cg00004257	NC	NC	NC
cg00004429	NC	NC	NC
cg00004438	NC	NC	NC
cg00004454	NC	NC	NC
cg00004533	NC	NC	NC
cg00004608	NC	NC	NC
cg00004633	NC	NC	NC
cg00004700	NC	NC	NC
cg00004723	NC	NC	NC
cg00004778	LD	LD	LD
cg00004806	NC	NC	NC
cg00004836	NC	NC	NC
cg00004883	NC	NC	NC
cg00004905	NC	NC	NC
cg00004915	NC	NC	NC
cg00004939	NC	NC	NC
cg00004979	NC	NC	NC
cg00004996	LI	LI	NL
cg00005010	NC	NC	NC
cg00005072	NC	NC	NC
cg00005077	NC	NC	NC
cg00005112	NC	NC	NC
cg00005166	NC	NC	NC
cg00005249	NC	NC	NC
cg00005297	NC	NC	NC
cg00005306	NC	NC	NC
cg00005325	NC	NC	NC
cg00005354	NC	NC	NC
cg00005423	NC	NC	NC
cg00005437	NC	NC	NC
cg00005440	NC	NC	NC
cg00005461	NC	NC	NC
cg00005541	NC	NC	NC
cg00005543	NC	NC	NC
cg00005597	NC	NC	NC
cg00005619	NC	NC	NC
cg00005622	NC	NC	NC
cg00005631	NC	NC	NC
cg00005644	NC	NC	NC
cg00005734	NC	NC	NC
cg00005740	NC	NC	NC
cg00005849	NC	NC	NC
cg00005861	NC	NC	NC
cg00005888	NC	NC	NC
cg00005893	NC	NC	NC
cg00006032	NC	NC	NC
cg00006040	NC	NC	NC
cg00006081	LI	LI	LI
cg00006122	NC	NC	NC
cg00006166	NC	NC	NC
cg00006183	NC	NC	NC
cg00006299	NC	NC	NC
cg00006387	LD	NC	NC
cg00006397	NC	NC	NC
cg00006414	NC	NC	NC
cg00006600	NC	NC	NC
cg00006609	NC	NC	NC
cg00006626	NC	NC	NC
cg00006713	NC	NC	NC
cg00006735	NC	NC	NC
cg00006787	NC	NC	NC
cg00006884	NC	NC	NC
cg00006899	NC	NC	NC
cg00006926	NC	NC	NC
cg00006948	NC	NC	NC
cg00007032	NC	NC	NC
cg00007064	NC	NC	NC
cg00007076	NC	NC	NC
cg00007127	NC	NC	NC
cg00007221	NC	NC	NC
cg00007226	NC	NC	NC
cg00007239	NC	NC	NC
cg00007266	NC	NC	NC
cg00007269	NC	NC	NC
cg00007300	NC	NC	NC
cg00007324	NC	NC	NC
cg00007326	NC	NC	NC
cg00007420	NC	NC	NC
cg00007426	NC	NC	NC
cg00007466	NC	NC	NC
cg00007540	NC	NC	NC
cg00007644	NC	NC	NC
cg00007675	NC	NC	NC
cg00007898	NC	NC	NC
cg00007932	NC	NC	NC
cg00007981	NC	NC	NC
cg00007987	NC	NC	NC
cg00008004	NC	NC	NC
cg00008033	LI	LI	LI
cg00008036	LI	LI	NC
cg00008075	NC	NC	NC
cg00008282	NC	NC	NC
cg00008345	NC	NC	NC
cg00008387	NC	NC	NC
cg00008404	NC	NC	NC
cg00008446	NC	NC	NC
cg00008488	NC	NC	NC
cg00008493	NC	NC	NC
cg00008500	NC	NC	NC
cg00008564	NC	NC	NC
cg00008621	NC	NC	NC
cg00008647	NC	NC	NC
cg00008665	NC	NC	NC
cg00008671	NC	NC	NC
cg00008695	NC	NC	NC
cg00008713	NC	NC	NC
cg00008737	NC	NC	NC
cg00008795	NC	NC	NC
cg00008810	NC	NC	NC
cg00008819	NC	NC	NC
cg00008916	NC	NC	NC
cg00008956	NC	NC	NC
cg00008971	NC	NC	NC
cg00009053	NC	VI	NC
cg00009167	NC	NC	NC
cg00009200	NC	NC	NC
cg00009214	NC	NC	NC
cg00009293	NC	NC	NC
cg00009364	NC	NC	NC
cg00009407	NC	NC	NC
cg00009412	NC	NC	NC
cg00009421	NC	NC	NC
cg00009528	NC	NC	NC
cg00009556	NC	NC	NC
cg00009629	NC	NC	NC
cg00009644	NC	NC	NC
cg00009737	NC	NC	NC
cg00009750	NC	NC	NC
cg00009786	NC	NC	NC
cg00009834	NC	NC	NC
cg00009871	NC	NC	NC
cg00009919	LD	LD	NC
cg00009922	NC	NC	NC
cg00009944	NC	NC	NC
cg00009945	NC	NC	NC
cg00010046	NC	NC	NC
cg00010078	NC	NC	NC
cg00010108	NC	NC	NC
cg00010168	NC	NC	NC
cg00010266	NC	NC	NC
cg00010288	NC	NC	NC
cg00010445	NC	NC	NC
cg00010506	NC	NC	NC
cg00010533	NC	NC	NC
cg00010654	NC	NC	NC
cg00010664	NC	NC	NC
cg00010734	NC	NC	NC
cg00010738	NC	NC	NC
cg00010789	NC	NC	NC
cg00010848	NC	NC	NC
cg00010890	NC	NC	NC
cg00010900	NC	NC	NC
cg00010940	NC	NC	NC
cg00010946	NC	NC	NC
cg00010947	NC	NC	NC
cg00010992	NC	NC	NC
cg00011113	NC	NC	NC
cg00011122	NC	NC	NC
cg00011203	NC	NC	NC
cg00011225	NC	NC	NC
cg00011239	NC	NC	NC
cg00011247	NC	NC	NC
cg00011274	NC	NC	NC
cg00011284	NC	NC	NC
cg00011350	NC	NC	NC
cg00011459	NC	NC	NC
cg00011460	NC	NC	NC
cg00011461	NC	NC	NC
cg00011482	NC	NC	NC
cg00011564	NC	NC	NC
cg00011574	NC	NC	NC
cg00011578	NC	NC	NC
cg00011605	NC	NC	NC
cg00011616	NC	NC	NC
cg00011717	NC	NC	NC
cg00011740	NC	NC	NC
cg00011754	NC	NC	NC
cg00011762	NC	NC	NC
cg00011777	NC	NC	NC
cg00011794	NC	NC	NC
cg00011855	NC	NC	NC
cg00011861	NC	NC	NC
cg00011924	NC	NC	NC
cg00012036	NC	NC	NC
cg00012100	NL	NC	NC
cg00012126	NC	NC	NC
cg00012168	NC	NC	NC
cg00012194	NC	NC	NC
cg00012199	NC	NC	NC
cg00012203	NC	NC	NC
cg00012362	NC	NC	NC
cg00012386	NC	NC	NC
cg00012397	NC	NC	NC
cg00012469	NC	NC	NC
cg00012521	NC	NC	NC
cg00012522	NC	NC	NC
cg00012529	NC	NC	NC
cg00012536	NC	NC	NC
cg00012576	NC	NC	NC
cg00012587	NC	NC	NC
cg00012667	NC	NC	NC
cg00012692	NC	NC	NC
cg00012698	NC	NC	NC
cg00012701	NC	NC	NC
cg00012761	NC	NC	NC
cg00012762	NC	NC	NC
cg00012824	NC	NC	NC
cg00012840	NC	NC	NC
cg00012920	NC	NC	NC
cg00012992	NC	NC	NC
cg00013015	NC	NC	NC
cg00013301	NC	NC	NC
cg00013302	NC	NC	NC
cg00013369	NC	NC	NC
cg00013374	NC	NC	NC
cg00013386	NC	NC	NC
cg00013409	NC	NC	NC
cg00013410	NC	NC	NC
cg00013441	NC	NC	NC
cg00013451	NC	NC	NC
cg00013475	NC	NC	NC
cg00013530	NC	NC	NC
cg00013569	NC	NC	NC
cg00013618	NC	NC	NC
cg00013660	NC	NC	NC
cg00013677	NC	NC	NC
cg00013684	NC	NC	NC
cg00013688	NC	NC	NC
cg00013702	NC	NC	NC
cg00013733	NC	NC	NC
cg00013759	NC	NC	NC
cg00013809	NC	NC	NC
cg00013831	NC	NC	NC
cg00013899	NC	NC	NC
cg00014020	NC	NC	NC
cg00014085	NC	NC	NC
cg00014104	NC	NC	NC
cg00014112	NC	NC	NC
cg00014118	NC	NC	NC
cg00014168	NC	NC	NC
cg00014176	NC	NC	NC
cg00014194	NC	NC	NC
cg00014272	NC	NC	NC
cg00014278	NC	NC	NC
cg00014285	NC	NC	NC
cg00014289	NC	NC	NC
cg00014301	NC	NC	NC
cg00014327	NC	NC	NC
cg00014333	NC	NC	NC
cg00014380	NC	NC	NC
cg00014434	NC	NC	NC
cg00014445	NC	NC	NC
cg00014484	NC	NC	NC
cg00014665	NC	NC	NC
cg00014733	NC	NC	NC
cg00014786	NC	NC	NC
cg00014806	NC	NC	NC
cg00014830	NC	NC	NC
cg00014837	NC	NC	NC
cg00014848	NC	NC	NC
cg00014893	NC	NC	NC
cg00014900	NC	NC	NC
cg00014931	NC	NC	NC
cg00014986	NC	NC	NC
cg00014991	NC	NC	NC
cg00014996	NC	NC	NC
cg00015002	NC	NC	NC
cg00015024	NC	NC	NC
cg00015058	NC	NC	NC
cg00015081	NC	NC	NC
cg00015121	NC	NC	NC
cg00015189	NC	NC	NC
cg00015193	NC	NC	NC
cg00015219	NC	NC	NC
cg00015289	NC	NC	NC
cg00015343	NC	NC	NC
cg00015373	NC	NC	NC
cg00015603	NC	NC	NC
cg00015629	NC	NC	NC
cg00015639	NC	NC	NC
cg00015664	NC	NC	NC
cg00015699	NC	NC	NC
cg00015770	NC	NC	NC
cg00015791	NC	NC	NC
cg00015798	NC	NC	NC
cg00015801	NC	NC	NC
cg00015838	NC	NC	NC
cg00015930	NC	NC	NC
cg00015991	NC	NC	NC
cg00016012	NC	NC	NC
cg00016048	NC	NC	NC
cg00016066	NC	NC	NC
cg00016127	NC	NC	NC
cg00016156	NC	NC	NC
cg00016223	NC	NC	NC
cg00016226	NC	NC	NC
cg00016255	LD	LD	LD
cg00016360	NC	NC	NC
cg00016406	NC	NC	NC
cg00016439	NC	NC	NC
cg00016481	NC	NC	NC
cg00016498	NC	NC	NC
cg00016538	NC	NC	NC
cg00016576	NC	NC	NC
cg00016593	NC	NC	NC
cg00016783	NC	NC	NC
cg00016841	NC	NC	NC
cg00016892	NC	NC	NC
cg00016913	NC	NC	NC
cg00016968	LD	LD	LD
cg00017002	NC	NC	NC
cg00017033	NC	NC	NC
cg00017188	NC	NC	NC
cg00017203	NC	NC	NC
cg00017271	NC	NC	NC
cg00017362	NC	NC	NC
cg00017363	NC	NC	NC
cg00017441	NC	NC	NC
cg00017461	NC	NC	NC
cg00017475	NC	NC	NC
cg00017489	NC	NC	NC
cg00017507	NC	NC	NC
cg00017557	NC	NC	NC
cg00017562	NC	NC	NC
cg00017601	NC	NC	NC
cg00017630	NC	NC	NC
cg00017709	NC	NC	NC
cg00017826	NC	NC	NC
cg00017842	NC	NC	NC
cg00017851	NC	NC	NC
cg00017931	NC	NC	NC
cg00017970	NC	NC	NC
cg00018010	NC	NC	NC
cg00018024	NC	NC	NC
cg00018103	NC	NC	NC
cg00018107	NC	NC	NC
cg00018128	NC	NC	NC
cg00018179	LD	LD	NC
cg00018216	NC	NC	NC
cg00018229	NC	NC	NC
cg00018305	NC	NC	NC
cg00018443	NC	NC	NC
cg00018524	NC	NC	NC
cg00018539	NC	NC	NC
cg00018557	NC	NC	NC
cg00018572	NC	NC	NC
cg00018606	NC	NC	NC
cg00018635	NC	NC	NC
cg00018667	NC	NC	NC
cg00018674	NC	NC	NC
cg00018682	NC	NC	NC
cg00018739	NC	NC	NC
cg00018758	NC	NC	NC
cg00018828	LD	NC	NC
cg00018845	LI	LI	NC
cg00018850	NC	NC	NC
cg00019082	NC	NC	NC
cg00019093	NC	NC	NC
cg00019118	NC	NC	NC
cg00019137	NC	NC	NC
cg00019141	NC	NC	NC
cg00019275	NL	NC	NC
cg00019301	NC	NC	NC
cg00019308	NC	NC	NC
cg00019366	NC	NC	NC
cg00019377	NC	NC	NC
cg00019458	NC	NC	NC
cg00019511	NC	NC	NC
cg00019553	NC	NC	NC
cg00019576	NC	NC	NC
cg00019607	NC	NC	NC
cg00019654	NC	NC	NC
cg00019678	NC	NC	NC
cg00019746	NC	NC	NC
cg00019759	LI	LI	LI
cg00019809	NC	NC	NC
cg00019826	NC	NC	NC
cg00019841	NC	NC	NC
cg00019877	NC	NC	NC
cg00020052	NC	NC	NC
cg00020063	LD	NC	NC
cg00020133	NC	NC	NC
cg00020229	NC	NC	NC
cg00020297	NC	NC	NC
cg00020340	NC	NC	NC
cg00020348	NC	NC	NC
cg00020390	NC	NC	NC
cg00020419	NC	NC	NC
cg00020450	NC	NC	NC
cg00020474	LI	LI	NC
cg00020617	NC	NC	NC
cg00020622	NC	NC	NC
cg00020649	NC	NC	NC
cg00020720	NC	NC	NC
cg00020794	NC	NC	NC
cg00020799	NC	NC	NC
cg00020807	NC	NC	NC
cg00020864	NC	NC	NC
cg00020967	NC	NC	NC
cg00020991	LD	LD	LD
cg00021028	NC	NC	NC
cg00021030	NC	NC	NC
cg00021108	NC	NC	NC
cg00021152	NC	NC	NC
cg00021166	NC	NC	NC
cg00021237	NC	NC	NC
cg00021242	NC	NC	NC
cg00021256	NC	NC	NC
cg00021264	NC	NC	NC
cg00021275	NC	NC	NC
cg00021325	NC	NC	NC
cg00021413	NC	NC	NC
cg00021476	NC	NC	NC
cg00021513	NC	NC	NC
cg00021527	NC	NC	NC
cg00021539	NC	NC	NC
cg00021540	NC	NC	NC
cg00021550	NC	NC	NC
cg00021576	NC	NC	NC
cg00021581	NC	NC	NC
cg00021663	NC	NC	NC
cg00021762	NC	NC	NC
cg00021764	NC	NC	NC
cg00021766	NC	NC	NC
cg00021783	NC	NC	NC
cg00021853	NC	NC	NC
cg00021855	NC	NC	NC
cg00021892	NC	NC	NC
cg00021895	NC	NC	NC
cg00021933	NC	NC	NC
cg00021944	NC	NC	NC
cg00022021	NC	NC	NC
cg00022024	NC	NC	NC
cg00022054	NC	NC	NC
cg00022059	NC	NC	NC
cg00022076	NC	NC	NC
cg00022101	NC	NC	NC
cg00022138	NC	NC	NC
cg00022145	NC	NC	NC
cg00022218	NC	NC	NC
cg00022235	NC	NC	NC
cg00022259	NC	NC	NC
cg00022308	NC	NC	NC
cg00022318	NC	NC	NC
cg00022401	NC	NC	NC
cg00022492	NC	NC	NC
cg00022594	NC	NC	NC
cg00022633	NC	NC	NC
cg00022642	NC	NC	NC
cg00022688	NC	NC	NC
cg00022826	LD	NC	NC
cg00022866	NC	NC	NC
cg00022871	NC	NC	NC
cg00022911	NC	NC	NC
cg00023001	NC	NC	NC
cg00023056	NC	NC	NC
cg00023132	NC	NC	NC
cg00023154	NC	NC	NC
cg00023168	NC	NC	NC
cg00023174	NC	NC	NC
cg00023185	LI	NC	NC
cg00023196	NC	NC	NC
cg00023197	LI	LI	NC
cg00023231	NC	NC	NC
cg00023233	NC	NC	NC
cg00023288	NC	NC	NC
cg00023301	NC	NC	NC
cg00023321	NC	NC	NC
cg00023345	NC	NC	NC
cg00023351	NC	NC	NC
cg00023363	NC	NC	NC
cg00023411	NC	NC	NC
cg00023464	NC	NC	NC
cg00023523	NC	NC	NC
cg00023648	NC	NC	NC
cg00023673	NC	NC	NC
cg00023695	NC	NC	NC
cg00023726	LD	NC	NC
cg00023728	NC	NC	NC
cg00023804	NC	NC	NC
cg00023808	NC	NC	NC
cg00023826	NC	NC	NC
cg00023916	NC	NC	NC
cg00023919	NC	NC	NC
cg00024086	LI	NC	LI
cg00024102	NC	NC	NC
cg00024244	NC	NC	NC
cg00024269	NC	NC	NC
cg00024280	NC	NC	NC
cg00024304	NC	NC	NC
cg00024361	NC	NC	NC
cg00024367	NC	NC	NC
cg00024377	NC	NC	NC
cg00024396	NC	NC	NC
cg00024404	NC	NC	NC
cg00024416	NC	NC	NC
cg00024437	NC	NC	NC
cg00024443	NC	NC	NC
cg00024456	NC	NC	NC
cg00024471	NC	NC	NC
cg00024472	NC	NC	NC
cg00024494	NC	NC	NC
cg00024515	NC	NC	NC
cg00024674	LD	LD	NC
cg00024701	NC	NC	NC
cg00024705	NC	NC	NC
cg00024722	NC	NC	NC
cg00024740	NC	NC	NC
cg00024790	NC	NC	NC
cg00024792	NC	NC	NC
cg00024812	NC	NC	NC
cg00024870	NC	NC	NC
cg00024937	NC	NC	NC
cg00024967	NC	NC	NC
cg00024989	NC	NC	NC
cg00024998	NC	NC	NC
cg00025138	NC	NC	NC
cg00025211	NC	NC	NC
cg00025216	NC	NC	NC
cg00025278	NC	NC	NC
cg00025328	NC	NC	NC
cg00025347	NC	NC	NC
cg00025357	NC	NC	NC
cg00025405	NC	NC	NC
cg00025436	NC	NC	NC
cg00025496	NC	NC	NC
cg00025526	NC	NC	NC
cg00025590	NC	NC	NC
cg00025591	NC	NC	NC
cg00025626	NC	NC	NC
cg00025643	NC	NC	NC
cg00025663	NC	NC	NC
cg00025715	NC	NC	NC
cg00025795	NC	NC	NC
cg00025823	VI	NC	NC
cg00025877	NC	NC	NC
cg00025981	NC	NC	NC
cg00025982	NC	NC	NC
cg00025991	NC	NC	NC
cg00026030	NC	NC	NC
cg00026104	NC	NC	NC
cg00026119	NC	NC	NC
cg00026141	NC	NC	NC
cg00026183	NC	NC	NC
cg00026222	NC	NC	NC
cg00026230	NC	NC	NC
cg00026239	NC	NC	NC
cg00026290	NC	NC	NC
cg00026302	NC	NC	NC
cg00026362	NC	NC	NC
cg00026363	NC	NC	NC
cg00026374	NC	NC	NC
cg00026401	NC	NC	NC
cg00026412	NC	NC	NC
cg00026455	NC	NC	NC
cg00026472	NC	NC	NC
cg00026474	NC	NC	NC
cg00026554	NC	NC	NC
cg00026570	NC	VI	NC
cg00026703	NL	NL	NL
cg00026729	NC	NC	NC
cg00026731	NC	NC	NC
cg00026803	NC	NC	NC
cg00026853	NC	NC	NC
cg00026891	NC	NC	NC
cg00026920	NC	NC	NC
cg00026974	NC	NC	NC
cg00027029	NC	NC	NC
cg00027038	NC	NC	NC
cg00027083	LI	LI	LI
cg00027114	NC	NC	NC
cg00027162	NC	NC	NC
cg00027232	NC	NC	NC
cg00027400	LI	LI	NC
cg00027466	NC	NC	NC
cg00027499	NC	NC	NC
cg00027570	NC	NC	NC
cg00027586	NC	NC	NC
cg00027619	NC	NC	NC
cg00027669	NC	NC	NC
cg00027674	NC	NC	NC
cg00027712	NC	NC	NC
cg00027729	NC	NC	NC
cg00027745	NC	NC	NC
cg00027940	NL	LD	NL
cg00027948	NC	NC	NC
cg00027990	NC	NC	NC
cg00027995	NC	NC	NC
cg00028013	NC	LD	LD
cg00028034	NC	NC	NC
cg00028056	NC	NC	NC
cg00028135	NL	NL	NL
cg00028184	NC	NC	NC
cg00028211	NC	NC	NC
cg00028336	NC	NC	NC
cg00028338	NC	NC	NC
cg00028429	LI	NC	NC
cg00028455	NC	NC	NC
cg00028480	NC	NC	NC
cg00028487	NC	NC	NC
cg00028507	LD	LD	NC
cg00028515	NC	NC	NC
cg00028595	NC	NC	NC
cg00028636	NC	NC	NC
cg00028677	NC	NC	NC
cg00028749	NC	NC	NC
cg00028757	NC	NC	NC
cg00028813	NC	NC	NC
cg00028829	NC	NC	NC
cg00028844	NC	NC	NC
cg00028870	NC	NC	NC
cg00028881	NC	NC	NC
cg00028918	NC	NC	NC
cg00028929	NC	NC	NC
cg00028935	LI	LI	LI
cg00028993	NC	NC	NC
cg00029031	NC	NC	NC
cg00029150	NC	NC	NC
cg00029161	NC	NC	NC
cg00029229	LD	LD	NC
cg00029233	NC	NC	NC
cg00029256	NC	NC	NC
cg00029284	LD	LD	NC
cg00029353	NC	NC	NC
cg00029397	NC	NC	NC
cg00029458	NC	NC	NC
cg00029465	NC	NC	NC
cg00029521	NC	NC	NC
cg00029587	NC	NC	NC
cg00029640	NC	NC	NC
cg00029647	NC	NC	NC
cg00029648	VI	VI	VI
cg00029678	NC	NC	NC
cg00029694	NC	NC	NC
cg00029812	NC	NC	NC
cg00029822	NC	NC	NC
cg00029825	NC	NC	NC
cg00029831	NC	NC	NC
cg00029922	NC	NC	NC
cg00029943	NC	NC	NC
cg00029973	NC	NC	NC
cg00029979	NC	NC	NC
cg00030005	NC	NC	NC
cg00030047	NC	NC	NC
cg00030074	NC	NC	NC
cg00030290	NC	NC	NC
cg00030291	NC	NC	NC
cg00030296	NC	NC	NC
cg00030420	LI	LI	NC
cg00030422	NC	NC	NC
cg00030427	NC	NC	NC
cg00030432	NC	NC	NC
cg00030466	NC	NC	NC
cg00030501	NC	NC	NC
cg00030508	NL	NC	NC
cg00030588	LD	LD	LD
cg00030591	NC	NC	NC
cg00030604	NC	NC	NC
cg00030627	NC	NC	NC
cg00030795	NC	NC	NC
cg00030816	NC	NC	NC
cg00031013	NC	NC	NC
cg00031059	NC	NC	NC
cg00031063	NC	NC	NC
cg00031105	LD	LD	NC
cg00031162	NC	NC	NC
cg00031165	NC	NC	NC
cg00031187	NC	NC	NC
cg00031256	NC	NC	NC
cg00031277	NC	NC	NC
cg00031340	NC	NC	NC
cg00031402	NC	NC	NC
cg00031443	NC	NC	NC
cg00031456	NC	NC	NC
cg00031491	NC	NC	NC
cg00031568	NC	NC	NC
cg00031663	NC	NC	NC
cg00031708	NC	NC	NC
cg00031779	NC	NC	NC
cg00031803	NC	NC	NC
cg00031823	NL	NL	NL
cg00031896	NC	NC	NC
cg00031999	NC	NC	NC
cg00032094	NC	NC	NC
cg00032173	NC	NC	NC
cg00032192	NC	NC	NC
cg00032227	NC	NC	NC
cg00032336	NC	NC	NC
cg00032366	NC	NC	NC
cg00032391	NC	NC	NC
cg00032458	NC	NC	NC
cg00032544	NC	NC	NC
cg00032576	NC	NC	NC
cg00032609	VI	NC	NC
cg00032610	NC	NC	NC
cg00032637	NC	NC	NC
cg00032664	NC	NC	NC
cg00032703	NC	NC	NC
cg00032756	NC	NC	NC
cg00032789	NC	NC	NC
cg00032805	LI	NC	NC
cg00032879	NC	NC	NC
cg00032884	NC	NC	NC
cg00032912	NC	NC	NC
cg00032923	NC	NC	NC
cg00032956	NC	NC	NC
cg00032959	NC	NC	NC
cg00033066	NC	NC	NC
cg00033127	NC	NC	NC
cg00033155	NC	NC	NC
cg00033220	NC	NC	NC
cg00033304	NC	NC	NC
cg00033334	NC	NC	NC
cg00033440	NC	NC	NC
cg00033450	NC	NC	NC
cg00033457	NC	NC	NC
cg00033490	NC	NC	NC
cg00033533	NC	NC	NC
cg00033551	NC	NC	NC
cg00033580	NC	NC	NC
cg00033623	NC	NC	NC
cg00033643	NC	NC	NC
cg00033666	NC	NC	NC
cg00033668	NC	NC	NC
cg00033678	NC	NC	NC
cg00033748	NC	NC	NC
cg00033750	NC	NC	NC
cg00033773	NC	NC	NC
cg00033806	NC	NC	NC
cg00033818	NC	NC	NC
cg00033834	NC	NC	NC
cg00033877	NC	NC	NC
cg00033950	NC	NC	NC
cg00033992	NC	NC	NC
cg00034003	NC	NC	NC
cg00034019	NC	NC	NC
cg00034039	NC	NC	NC
cg00034076	LI	LI	LI
cg00034101	LI	LI	NC
cg00034130	NC	NC	NC
cg00034241	NC	NC	NC
cg00034300	NC	NC	NC
cg00034316	NC	NC	NC
cg00034336	NC	NC	NC
cg00034360	NC	NC	NC
cg00034376	NC	NC	NC
cg00034416	NC	NC	NC
cg00034425	NC	NC	NC
cg00034433	NC	NC	NC
cg00034555	NC	NC	NC
cg00034559	NC	NC	NC
cg00034574	NC	NC	NC
cg00034604	NC	NC	NC
cg00034611	NC	NC	NC
cg00034635	NC	NC	NC
cg00034650	NC	NC	NC
cg00034755	NC	NC	NC
cg00034769	NC	NC	NC
cg00034781	NC	NC	NC
cg00034798	NC	NC	NC
cg00034823	NC	NC	NC
cg00035000	NC	NC	NC
cg00035074	NC	NC	NC
cg00035083	NC	NC	NC
cg00035197	NC	NC	NC
cg00035237	NC	NC	NC
cg00035249	NC	NC	NC
cg00035268	NL	NC	NC
cg00035316	NC	NC	NC
cg00035348	NC	NC	NC
cg00035389	NC	NC	NC
cg00035505	NC	NC	NC
cg00035526	NC	NC	NC
cg00035623	NC	NC	NC
cg00035630	NC	NC	NC
cg00035636	NC	NC	NC
cg00035673	NC	NC	NC
cg00035812	NC	NC	NC
cg00035847	NC	NC	NC
cg00035869	NC	NC	NC
cg00035889	NC	NC	NC
cg00035923	NC	NC	NC
cg00035934	NC	NC	NC
cg00035937	LD	LD	NL
cg00035945	NC	NC	NC
cg00035969	NC	NC	NC
cg00035980	NC	NC	NC
cg00036011	NC	NC	NC
cg00036110	NC	NC	NC
cg00036115	NC	NC	NC
cg00036119	NC	NC	NC
cg00036137	NC	NC	NC
cg00036258	NC	NC	NC
cg00036263	NC	NC	NC
cg00036279	NC	NC	NC
cg00036324	NC	NC	NC
cg00036328	NC	NC	NC
cg00036347	NC	NC	NC
cg00036352	NC	NC	NC
cg00036440	NC	NC	NC
cg00036558	LD	LD	LD
cg00036570	NC	NC	NC
cg00036585	NC	NC	NC
cg00036588	NC	NC	NC
cg00036619	NC	NC	NC
cg00036664	NC	NC	NC
cg00036710	NC	NC	NC
cg00036723	NC	NC	NC
cg00036732	LD	LD	NL
cg00036871	NL	NC	NC
cg00036976	NC	NC	NC
cg00037013	NC	NC	NC
cg00037026	NC	NC	NC
cg00037131	NC	NC	NC
cg00037153	NC	NC	NC
cg00037186	NC	NC	NC
cg00037188	NC	NC	NC
cg00037223	NC	NC	NC
cg00037314	NC	NC	NC
cg00037388	NC	NC	NC
cg00037400	NC	NC	NC
cg00037406	NC	NC	NC
cg00037441	LI	LI	NC
cg00037457	LI	LI	NC
cg00037458	NC	LD	LD
cg00037755	NC	NC	NC
cg00037763	NC	NC	NC
cg00037930	NC	NC	NC
cg00037940	NC	NC	NC
cg00037952	NC	NC	NC
cg00038046	NC	NC	NC
cg00038167	NC	NC	NC
cg00038193	NC	NC	NC
cg00038239	NC	NC	NC
cg00038298	NC	NC	NC
cg00038342	NC	NC	NC
cg00038358	NC	NC	NC
cg00038376	NC	NC	NC
cg00038436	NC	NC	NC
cg00038446	NC	NC	NC
cg00038450	NC	NC	NC
cg00038675	NC	NC	NC
cg00038681	NC	NC	NC
cg00038688	NC	NC	NC
cg00038736	NC	NC	NC
cg00038760	NC	NC	NC
cg00038877	NC	NC	NC
cg00038997	NC	NC	NC
cg00039016	NC	NC	NC
cg00039044	NC	NC	NC
cg00039048	NC	NC	NC
cg00039057	NC	NC	NC
cg00039070	NC	NC	NC
cg00039129	NC	NC	NC
cg00039142	LD	LD	NC
cg00039170	NC	NC	NC
cg00039177	NC	NC	NC
cg00039180	NC	NC	NC
cg00039279	NC	NC	NC
cg00039326	NL	NL	NL
cg00039441	LI	LI	NC
cg00039463	NC	NC	NC
cg00039478	NC	NC	NC
cg00039480	NC	NC	NC
cg00039505	NC	NC	NC
cg00039627	NC	NC	NC
cg00039649	NC	NC	NC
cg00039672	NC	NC	NC
cg00039793	NC	NC	NC
cg00039794	NC	NC	NC
cg00039795	NC	NC	NC
cg00039840	NC	NC	NC
cg00039845	NC	NC	NC
cg00039864	NC	NC	NC
cg00039913	NC	NC	NC
cg00039945	LD	LD	LD
cg00039998	NC	NC	NC
cg00040007	LI	NC	NC
cg00040008	NC	NC	NC
cg00040278	NC	NC	NC
cg00040288	NC	NC	NC
cg00040312	NC	NC	NC
cg00040322	NC	NC	NC
cg00040367	NC	NC	NC
cg00040380	NC	NC	NC
cg00040393	NC	NC	NC
cg00040423	NC	NC	NC
cg00040426	NC	NC	NC
cg00040427	NC	NC	NC
cg00040466	NC	NC	NC
cg00040504	NC	NC	NC
cg00040566	NC	NC	NC
cg00040569	NC	NC	NC
cg00040575	NL	NL	NL
cg00040588	NC	NC	NC
cg00040590	NC	NC	NC
cg00040688	NC	NC	NC
cg00040708	NC	NC	NC
cg00040738	NC	NC	NC
cg00040744	NC	NC	NC
cg00040749	NC	NC	NC
cg00040781	NC	NC	NC
cg00040861	NC	NC	NC
cg00040862	NC	NC	NC
cg00040873	NC	NC	NC
cg00040945	NC	NC	NC
cg00040986	NC	NC	NC
cg00041014	NC	NC	NC
cg00041030	NC	NC	NC
cg00041083	NC	NC	NC
cg00041084	NC	NC	NC
cg00041270	NC	NC	NC
cg00041328	NC	NC	NC
cg00041368	NC	NC	NC
cg00041401	NC	NC	NC
cg00041515	NC	NC	NC
cg00041575	NC	NC	NC
cg00041599	NC	NC	NC
cg00041636	NC	NC	NC
cg00041666	NC	NC	NC
cg00041829	NC	NC	NC
cg00041865	NC	NC	NC
cg00041872	NC	NC	NC
cg00041873	NC	NC	NC
cg00041898	NC	NC	NC
cg00041901	NC	NC	NC
cg00041903	NC	NC	NC
cg00041980	NC	NC	NC
cg00041989	NC	NC	NC
cg00041995	NC	NC	NC
cg00042059	NC	NC	NC
cg00042080	NC	NC	NC
cg00042081	NC	NC	NC
cg00042144	NC	NC	NC
cg00042186	NC	NC	NC
cg00042205	NC	NC	NC
cg00042244	LD	NC	NC
cg00042263	NC	NC	NC
cg00042325	NC	NC	NC
cg00042335	NC	NC	NC
cg00042356	NC	NC	NC
cg00042419	NC	NC	NC
cg00042433	NC	NC	NC
cg00042478	NC	NC	NC
cg00042650	NC	NC	NC
cg00042654	LD	LD	LD
cg00042683	NC	NC	NC
cg00042733	NC	NC	NC
cg00042810	NC	NC	NC
cg00042837	NC	NC	NC
cg00042874	NC	NC	NC
cg00042882	NC	NC	NC
cg00042896	LD	NC	NC
cg00042969	NC	NC	NC
cg00042994	NC	NC	NC
cg00043005	NC	NC	NC
cg00043080	NC	NC	NC
cg00043095	NC	NC	NC
cg00043234	NC	NC	NC
cg00043265	NC	NC	NC
cg00043284	NC	NC	NC
cg00043347	NC	NC	NC
cg00043364	NC	NC	NC
cg00043371	NC	NC	NC
cg00043379	NC	NC	NC
cg00043444	NC	NC	NC
cg00043564	LI	NC	NC
cg00043591	NC	NC	NC
cg00043599	NC	NC	NC
cg00043664	NC	NC	NC
cg00043771	LD	LD	NC
cg00043784	NC	NC	NC
cg00043788	NC	NC	NC
cg00043790	NC	NC	NC
cg00043800	NC	NC	NC
cg00043819	NC	NC	NC
cg00043905	NC	NC	NC
cg00043949	NC	NC	NC
cg00044050	NC	NC	NC
cg00044095	NC	NC	NC
cg00044097	NC	NC	NC
cg00044103	NC	NC	NC
cg00044143	NC	NC	NC
cg00044170	NC	NC	NC
cg00044179	NC	NC	NC
cg00044210	NC	NC	NC
cg00044245	NC	NC	NC
cg00044289	NC	NC	NC
cg00044318	NC	NC	NC
cg00044323	NC	NC	NC
cg00044372	NC	NC	NC
cg00044430	NC	NC	NC
cg00044440	NC	NC	NC
cg00044448	LD	NC	NC
cg00044488	NC	NC	NC
cg00044505	NC	NC	NC
cg00044545	NC	NC	NC
cg00044551	NC	NC	NC
cg00044638	NC	NC	NC
cg00044665	NC	NC	NC
cg00044729	NC	NC	NC
cg00044757	NC	NC	NC
cg00044807	NC	NC	NC
cg00044848	NC	NC	NC
cg00044871	NC	NC	NC
cg00044968	NC	NC	NC
cg00044995	NC	NC	NC
cg00045008	NC	NC	NC
cg00045025	NC	NC	NC
cg00045061	NC	NC	NC
cg00045163	NC	NC	NC
cg00045190	NC	NC	NC
cg00045227	NC	NC	NC
cg00045248	NC	NC	NC
cg00045273	NC	NC	NC
cg00045275	NC	NC	NC
cg00045303	NC	NC	NC
cg00045357	NC	NC	NC
cg00045515	NC	NC	NC
cg00045592	NC	NC	NC
cg00045607	NC	NC	NC
cg00045753	NC	NC	NC
cg00045762	NC	NC	NC
cg00045763	NC	NC	NC
cg00045787	NC	NC	NC
cg00045902	NC	NC	NC
cg00045967	NC	NC	NC
cg00046018	NC	NC	NC
cg00046026	NC	NC	NC
cg00046041	NC	NC	NC
cg00046073	NC	NC	NC
cg00046105	NC	NC	NC
cg00046336	NC	NC	NC
cg00046347	NC	NC	NC
cg00046432	NC	NC	NC
cg00046501	NC	NC	NC
cg00046537	NC	NC	NC
cg00046560	NC	NC	NC
cg00046571	NC	NC	NC
cg00046710	NC	NC	NC
cg00046744	NL	NC	NC
cg00046815	NC	NC	NC
cg00046819	NC	NC	NC
cg00046877	LD	LD	LD
cg00046899	NC	NC	NC
cg00046913	NC	NC	NC
cg00046914	NC	NC	NC
cg00046981	NC	NC	NC
cg00046991	NC	NC	NC
cg00047003	NC	NC	NC
cg00047050	LD	LD	LD
cg00047052	NC	NC	NC
cg00047079	NC	NC	NC
cg00047081	NC	NC	NC
cg00047222	NC	NC	NC
cg00047287	NC	NC	NC
cg00047338	NC	NC	NC
cg00047443	NC	NC	NC
cg00047466	NC	NC	NC
cg00047469	NC	NC	NC
cg00047512	NC	NC	NC
cg00047683	NC	NC	NC
cg00047694	NC	NC	NC
cg00047753	NC	NC	NC
cg00047815	NC	NC	NC
cg00047844	NC	NC	NC
cg00047873	NC	NC	NC
cg00047941	NC	NC	NC
cg00048066	NC	NC	NC
cg00048078	NC	NC	NC
cg00048079	NC	NC	NC
cg00048134	NC	NC	NC
cg00048149	NC	NC	NC
cg00048178	NC	NC	NC
cg00048381	NC	NC	NC
cg00048420	NC	NC	NC
cg00048436	NC	NC	NC
cg00048458	NL	NC	NC
cg00048525	NC	NC	NC
cg00048697	NC	NC	NC
cg00048746	NC	NC	NC
cg00048759	LI	LI	LI
cg00048823	NC	NC	NC
cg00048842	NC	NC	NC
cg00048905	NC	NC	NC
cg00048983	NC	LI	NC
cg00049033	NC	NC	NC
cg00049047	LI	LI	LI
cg00049102	NC	NC	NC
cg00049156	NC	NC	NC
cg00049253	NC	NC	NC
cg00049286	NC	NC	NC
cg00049323	NC	NC	NC
cg00049400	NC	NC	NC
cg00049411	NC	NC	NC
cg00049440	NC	NC	NC
cg00049502	NC	NC	NC
cg00049545	NC	NC	NC
cg00049582	NC	NC	NC
cg00049595	NC	NC	NC
cg00049616	NC	NC	NC
cg00049674	NC	NC	NC
cg00049691	NC	NC	NC
cg00049709	NC	NC	NC
cg00049729	NC	NC	NC
cg00049868	NC	NC	NC
cg00049883	NC	NC	NC
cg00049892	NC	NC	NC
cg00049903	NC	NC	NC
cg00049914	NC	NC	NC
cg00049973	NC	NC	NC
cg00049981	NC	NC	NC
cg00050034	NC	NC	NC
cg00050152	NC	NC	NC
cg00050224	NC	NC	NC
cg00050247	NC	NC	NC
cg00050250	NC	NC	NC
cg00050284	NC	NC	NC
cg00050294	NC	NC	NC
cg00050336	NC	NC	NC
cg00050342	NC	NC	NC
cg00050375	NC	NC	NC
cg00050402	NC	NC	NC
cg00050416	NC	NC	NC
cg00050440	NC	NC	NC
cg00050482	NC	NC	NC
cg00050496	NC	NC	NC
cg00050505	NC	NC	NC
cg00050590	NC	NC	NC
cg00050618	NC	NC	NC
cg00050625	NC	NC	NC
cg00050629	NC	NC	NC
cg00050692	NC	NC	NC
cg00050697	NC	NC	NC
cg00050792	NC	NC	NC
cg00050938	NC	NC	NC
cg00050984	NC	NC	NC
cg00051022	NC	NC	NC
cg00051068	NC	NC	NC
cg00051179	NC	NC	NC
cg00051200	NC	NC	NC
cg00051275	NC	NC	NC
cg00051307	NC	NC	NC
cg00051371	NC	NC	NC
cg00051443	NC	NC	NC
cg00051546	NC	NC	NC
cg00051590	NC	NC	NC
cg00051595	NC	NC	NC
cg00051662	NC	NC	NC
cg00051704	NC	NC	NC
cg00051762	NC	NC	NC
cg00051782	NC	NC	NC
cg00051979	NC	NC	NC
cg00052046	NC	NC	NC
cg00052290	NC	NC	NC
cg00052385	NC	NC	NC
cg00052422	NC	NC	NC
cg00052433	NC	NC	NC
cg00052459	NC	NC	NC
cg00052550	NC	NC	NC
cg00052588	NC	NC	NC
cg00052692	NC	NC	NC
cg00052772	NC	NC	NC
cg00052836	NC	NC	NC
cg00052853	NC	NC	NC
cg00052865	NC	NC	NC
cg00052925	NC	NC	NC
cg00052932	NC	NC	NC
cg00052970	NC	NC	NC
cg00053010	NC	NC	NC
cg00053073	NC	NC	NC
cg00053135	NC	NC	NC
cg00053292	NC	NC	NC
cg00053338	NC	NC	NC
cg00053361	NC	NC	NC
cg00053373	NC	NC	NC
cg00053393	NC	NC	NC
cg00053507	NC	NC	NC
cg00053617	NC	NC	NC
cg00053618	NC	NC	NC
cg00053661	NC	NC	NC
cg00053755	NC	NC	NC
cg00053783	NC	NC	NC
cg00053839	NC	NC	NC
cg00053851	NC	NC	NC
cg00053870	NC	NC	NC
cg00053916	NC	NC	NC
cg00053927	NC	NC	NC
cg00053967	NC	NC	NC
cg00054047	NC	NC	NC
cg00054173	NC	NC	NC
cg00054197	NC	NC	NC
cg00054210	NC	NC	NC
cg00054248	NC	NC	NC
cg00054301	NC	NC	NC
cg00054372	NC	NC	NC
cg00054384	NC	NC	NC
cg00054408	NC	NC	NC
cg00054472	NC	NC	NC
cg00054496	NC	NC	NC
cg00054511	NC	NC	NC
cg00054525	NC	NC	NC
cg00054564	NC	NC	NC
cg00054692	NC	NC	NC
cg00054702	NC	NC	NC
cg00054706	NC	NC	NC
cg00054710	NC	NC	NC
cg00054741	NC	NC	NC
cg00054771	NC	NC	NC
cg00054774	NC	NC	NC
cg00054791	NC	NC	NC
cg00055030	NC	NC	NC
cg00055049	NC	NC	NC
cg00055052	NC	NC	NC
cg00055067	NC	NC	NC
cg00055073	NC	NC	NC
cg00055292	NL	NC	NC
cg00055341	NC	NC	NC
cg00055353	NC	NC	NC
cg00055361	NC	NC	NC
cg00055510	NC	NC	NC
cg00055528	NC	NC	NC
cg00055555	NC	NC	NC
cg00055557	NC	NC	NC
cg00055595	NC	NC	NC
cg00055679	LI	LI	LI
cg00055726	NC	NC	NC
cg00055747	NC	NC	NC
cg00055771	NC	NC	NC
cg00055848	NC	NC	NC
cg00055860	NC	NC	NC
cg00055876	NC	NC	NC
cg00055945	NC	NC	NC
cg00055981	NC	NC	NC
cg00055986	NC	NC	NC
cg00056002	NC	NC	NC
cg00056066	NL	NC	NC
cg00056074	NC	NC	NC
cg00056202	NC	NC	NC
cg00056257	NC	NC	NC
cg00056280	NC	NC	NC
cg00056433	NC	NC	NC
cg00056497	NC	NC	NC
cg00056508	NC	NC	NC
cg00056541	NC	NC	NC
cg00056563	NC	NC	NC
cg00056578	NC	NC	NC
cg00056605	NC	NC	NC
cg00056628	NC	NC	NC
cg00056676	NC	NC	NC
cg00056692	LD	LD	NC
cg00056754	NC	NC	NC
cg00056767	NC	NC	NC
cg00056834	NC	NC	NC
cg00056963	NC	NC	NC
cg00056985	NC	NC	NC
cg00057092	NC	NC	NC
cg00057100	NC	NC	NC
cg00057208	NC	NC	NC
cg00057231	NC	NC	NC
cg00057317	NC	NC	NC
cg00057324	NC	NC	NC
cg00057376	NC	NC	NC
cg00057393	NC	NC	NC
cg00057449	NC	NC	NC
cg00057476	NC	NC	NC
cg00057521	NC	NC	NC
cg00057550	NC	NC	NC
cg00057593	NC	NC	NC
cg00057603	NC	NC	NC
cg00057661	NC	NC	NC
cg00057663	NC	NC	NC
cg00057667	NC	NC	NC
cg00057676	NC	NC	NC
cg00057689	NC	NC	NC
cg00057693	NC	NC	NC
cg00057700	NC	NC	NC
cg00057722	NC	NC	NC
cg00057840	NC	NC	NC
cg00057966	NC	NC	NC
cg00058009	NC	NC	NC
cg00058026	NC	NC	NC
cg00058061	NC	NC	NC
cg00058226	NC	NC	NC
cg00058235	NC	NC	NC
cg00058288	NC	NC	NC
cg00058290	NC	NC	NC
cg00058291	NC	NC	NC
cg00058296	NC	NC	NC
cg00058329	LI	LI	LI
cg00058413	NC	NC	NC
cg00058436	NC	NC	NC
cg00058515	NC	NC	NC
cg00058527	NC	NC	NC
cg00058576	NC	NC	NC
cg00058626	NC	NC	NC
cg00058644	NC	NC	NC
cg00058652	NC	NC	NC
cg00058696	NC	NC	NC
cg00058708	NC	NC	NC
cg00058743	NC	NC	NC
cg00058767	NC	NC	NC
cg00058771	NC	NC	NC
cg00058786	NC	NC	NC
cg00058799	NC	NC	NC
cg00058857	NC	NC	NC
cg00058879	LI	LI	LI
cg00058887	NC	NC	NC
cg00058903	NC	NC	NC
cg00058923	NC	NC	NC
cg00058938	NC	NC	NC
cg00059015	NC	NC	NC
cg00059024	NC	NC	NC
cg00059041	NC	NC	NC
cg00059161	NC	NC	NC
cg00059165	NC	NC	NC
cg00059225	LI	LI	LI
cg00059240	NC	NC	NC
cg00059246	NC	NC	NC
cg00059309	NC	NC	NC
cg00059387	NC	NC	NC
cg00059399	NC	NC	NC
cg00059424	NC	NC	NC
cg00059439	NC	NC	NC
cg00059510	NC	NC	NC
cg00059625	NC	NC	NC
cg00059659	NC	NC	NC
cg00059662	LD	LD	NC
cg00059664	NC	NC	NC
cg00059699	NC	NC	NC
cg00059707	NC	NC	NC
cg00059737	NC	NC	NC
cg00059740	NC	NC	NC
cg00059880	NC	NC	NC
cg00059930	NC	NC	NC
cg00059937	NC	NC	NC
cg00059963	NC	NC	NC
cg00060004	NC	NC	NC
cg00060026	LD	LD	NC
cg00060287	NC	NC	NC
cg00060304	NC	NC	NC
cg00060320	NC	NC	NC
cg00060374	NC	NC	NC
cg00060403	NC	NC	NC
cg00060484	NC	NC	NC
cg00060627	NC	NC	NC
cg00060628	NC	NC	NC
cg00060649	NC	NC	NC
cg00060683	NC	NC	NC
cg00060711	NC	NC	NC
cg00060734	NC	NC	NC
cg00060762	NC	NC	NC
cg00060796	NC	NC	NC
cg00060800	NC	NC	NC
cg00060827	NC	NC	NC
cg00060866	NC	NC	NC
cg00060880	NC	NC	NC
cg00060956	NC	NC	NC
cg00061031	NL	NL	NC
cg00061039	NC	NC	NC
cg00061086	NC	NC	NC
cg00061145	NC	NC	NC
cg00061150	NC	NC	NC
cg00061185	NC	NC	NC
cg00061209	NC	NC	NC
cg00061217	NC	NC	NC
cg00061233	NC	NC	NC
cg00061264	NC	NC	NC
cg00061306	NC	NC	NC
cg00061309	NC	NC	NC
cg00061313	NC	NC	NC
cg00061368	NC	NC	NC
cg00061412	NC	NC	NC
cg00061413	NC	NC	NC
cg00061421	NC	NC	NC
cg00061479	NC	NC	NC
cg00061575	NC	NC	NC
cg00061632	NC	NC	NC
cg00061635	NC	NC	NC
cg00061678	NC	NC	NC
cg00061695	NC	NC	NC
cg00061769	NC	NC	NC
cg00061805	NC	NC	NC
cg00061860	NC	NC	NC
cg00061907	NC	NC	NC
cg00061989	NC	NC	NC
cg00062012	NC	NC	NC
cg00062050	NC	NC	NC
cg00062151	NC	NC	NC
cg00062245	LI	LI	NC
cg00062282	NC	NC	NC
cg00062312	NC	NC	NC
cg00062484	NC	NC	NC
cg00062496	NC	NC	NC
cg00062678	NC	NC	NC
cg00062703	NC	NC	NC
cg00062776	NC	NC	NC
cg00062873	NC	NC	NC
cg00063006	NC	NC	NC
cg00063066	NC	NC	NC
cg00063073	LD	LD	LD
cg00063077	NC	NC	NC
cg00063144	NC	NC	NC
cg00063174	NC	NC	NC
cg00063223	NC	NC	NC
cg00063246	NC	NC	NC
cg00063268	NC	NC	NC
cg00063279	NC	NC	NC
cg00063284	NC	NC	NC
cg00063291	NC	NC	NC
cg00063346	NC	NC	NC
cg00063348	NC	NC	NC
cg00063357	NC	NC	NC
cg00063369	NC	NC	NC
cg00063392	NC	NC	NC
cg00063402	NC	NC	NC
cg00063471	NC	NC	NC
cg00063535	NC	NC	NC
cg00063567	NC	NC	NC
cg00063649	NC	NC	NC
cg00063703	NC	NC	NC
cg00063734	NC	NC	NC
cg00063744	NC	NC	NC
cg00063748	LD	LD	NC
cg00063828	NC	NC	NC
cg00063945	NC	NC	NC
cg00063979	NC	NC	NC
cg00063987	NC	NC	NC
cg00064020	LI	NC	NC
cg00064051	NC	NC	NC
cg00064080	NC	NC	NC
cg00064154	NC	NC	NC
cg00064172	NC	NC	NC
cg00064218	NC	NC	NC
cg00064235	NC	NC	NC
cg00064250	NC	NC	NC
cg00064261	NC	NC	NC
cg00064267	NC	NC	NC
cg00064284	NC	NC	NC
cg00064296	NC	NC	NC
cg00064341	LD	LD	LD
cg00064347	NC	NC	NC
cg00064408	NC	NC	NC
cg00064415	NC	NC	NC
cg00064525	NC	NC	NC
cg00064589	NC	NC	NC
cg00064733	LI	LI	LI
cg00064778	NC	NC	NC
cg00064950	NC	NC	NC
cg00064972	NC	NC	NC
cg00065048	NC	LD	NC
cg00065061	NC	NC	NC
cg00065071	NC	NC	NC
cg00065088	NC	NC	NC
cg00065128	NC	NC	NC
cg00065261	NC	NC	NC
cg00065302	NC	NC	NC
cg00065385	NC	NC	NC
cg00065408	NC	NC	NC
cg00065419	NC	NC	NC
cg00065430	NC	NC	NC
cg00065446	NC	NC	NC
cg00065493	NC	NC	NC
cg00065569	NC	NC	NC
cg00065570	NC	NC	NC
cg00065581	NC	NC	NC
cg00065591	NC	NC	NC
cg00065598	LD	LD	NC
cg00065613	NC	NC	NC
cg00065726	NC	NC	NC
cg00065764	NC	NC	NC
cg00065921	NC	NC	NC
cg00065935	LI	LI	NC
cg00065942	NC	NC	NC
cg00065944	LD	LD	LD
cg00065957	NC	NC	NC
cg00066110	NC	NC	NC
cg00066151	NC	NC	NC
cg00066153	NC	NC	NC
cg00066182	NC	NC	NC
cg00066198	NC	NC	NC
cg00066239	NC	NC	NC
cg00066249	NC	NC	NC
cg00066270	NC	NC	NC
cg00066351	NC	NC	NC
cg00066413	NC	NC	NC
cg00066449	NC	NC	NC
cg00066468	NC	NC	NC
cg00066499	NC	NC	NC
cg00066508	NC	NC	NC
cg00066511	NC	LD	NC
cg00066554	NC	NC	NC
cg00066627	NC	NC	NC
cg00066663	NC	NC	NC
cg00066671	LI	NC	NC
cg00066722	NC	NC	NC
cg00066750	NC	NC	NC
cg00066768	NC	NC	NC
cg00066805	NC	NC	NC
cg00066816	NC	NC	NC
cg00066817	NC	NC	NC
cg00066828	NC	NC	NC
cg00066832	NC	NC	NC
cg00066854	NC	NC	NC
cg00066910	LD	NC	NC
cg00066919	NC	NC	NC
cg00066925	NC	NC	NC
cg00067018	LI	NC	NC
cg00067049	NC	NC	NC
cg00067058	NC	NC	NC
cg00067095	NC	NC	NC
cg00067102	NC	NC	NC
cg00067126	NC	NC	NC
cg00067133	NC	NC	NC
cg00067196	NC	NC	NC
cg00067365	NC	NC	NC
cg00067414	NC	NC	NC
cg00067424	NC	NC	NC
cg00067427	NC	NC	NC
cg00067471	LD	NC	NC
cg00067518	NC	NC	NC
cg00067528	NC	NC	NC
cg00067576	NC	NC	NC
cg00067588	NC	NC	NC
cg00067696	NC	NC	NC
cg00067702	NC	NC	NC
cg00067720	NC	NC	NC
cg00067742	NC	NC	NC
cg00067753	NC	NC	NC
cg00067758	NC	NC	NC
cg00067768	NC	NC	NC
cg00067814	NC	NC	NC
cg00067824	NC	NC	NC
cg00067884	NC	NC	NC
cg00067941	NC	NC	NC
cg00068038	NC	NC	NC
cg00068102	NC	NC	NC
cg00068153	NC	NC	NC
cg00068155	NC	NC	NC
cg00068174	NC	NC	NC
cg00068217	NC	NC	NC
cg00068265	NC	NC	NC
cg00068305	NC	NC	NC
cg00068377	NC	NC	NC
cg00068391	NC	NC	NC
cg00068412	NC	NC	NC
cg00068433	LD	NC	NC
cg00068503	NC	NC	NC
cg00068622	NC	NC	NC
cg00068745	LD	LD	LD
cg00068750	NC	NC	NC
cg00068810	NC	NC	NC
cg00068909	NC	NC	NC
cg00069002	LI	LI	LI
cg00069017	NC	NC	NC
cg00069059	NC	NC	NC
cg00069224	NC	NC	NC
cg00069242	LI	LI	LI
cg00069261	NC	NC	NC
cg00069314	NC	NC	NC
cg00069341	NC	NC	NC
cg00069401	NC	NC	NC
cg00069417	NC	NC	NC
cg00069432	NC	NC	NC
cg00069463	NC	NC	NC
cg00069642	NC	NC	NC
cg00069658	NC	NC	NC
cg00069760	NC	NC	NC
cg00069815	NC	NC	NC
cg00069860	NC	NC	NC
cg00069969	NC	NC	NC
cg00070042	NC	NC	NC
cg00070043	NC	NC	NC
cg00070052	NC	NC	NC
cg00070105	NC	NC	NC
cg00070162	NC	NC	NC
cg00070172	NC	NC	NC
cg00070181	NC	NC	NC
cg00070370	NC	NC	NC
cg00070380	NC	NC	NC
cg00070383	NC	NC	NC
cg00070424	NC	NC	NC
cg00070460	NC	NC	NC
cg00070588	NC	NC	NC
cg00070621	NC	NC	NC
cg00070678	NC	NC	NC
cg00070680	NC	NC	NC
cg00070722	NC	NC	NC
cg00070771	NC	NC	NC
cg00070814	NC	NC	NC
cg00070868	NC	NC	NC
cg00070908	NC	NC	NC
cg00070940	NC	NC	NC
cg00071026	NC	NC	NC
cg00071051	NC	NC	NC
cg00071210	NC	NC	NC
cg00071215	NC	NC	NC
cg00071241	NC	NC	NC
cg00071265	NC	NC	NC
cg00071343	NC	NC	NC
cg00071360	NC	NC	NC
cg00071382	NC	NC	NC
cg00071408	NC	NC	NC
cg00071442	NC	NC	NC
cg00071554	NC	NC	NC
cg00071605	NC	NC	NC
cg00071658	NC	NC	NC
cg00071692	NC	NC	NC
cg00071727	NC	NC	NC
cg00071751	NC	NC	NC
cg00071887	NC	NC	NC
cg00071911	NC	NC	NC
cg00071950	NC	NC	NC
cg00071984	NC	NC	NC
cg00071998	NC	NC	NC
cg00072099	NC	NC	NC
cg00072158	NC	NC	NC
cg00072172	NC	NC	NC
cg00072216	NC	NC	NC
cg00072317	NC	NC	NC
cg00072369	NC	NC	NC
cg00072406	NC	NC	NC
cg00072407	NC	NC	NC
cg00072426	NC	NC	NC
cg00072449	NC	NC	NC
cg00072478	NC	NC	NC
cg00072675	NC	NC	NC
cg00072689	NC	NC	NC
cg00072711	NC	NC	NC
cg00072720	LI	LI	LI
cg00072891	NC	NC	NC
cg00072957	NC	NC	NC
cg00073010	NC	NC	NC
cg00073090	LD	NC	NC
cg00073181	NC	NC	NC
cg00073244	LD	LD	NC
cg00073261	NC	NC	NC
cg00073322	NC	NC	NC
cg00073380	NC	NC	NC
cg00073460	LD	LD	LD
cg00073543	NC	NC	NC
cg00073549	NC	NC	NC
cg00073550	NC	NC	NC
cg00073565	NC	NC	NC
cg00073713	NC	NC	NC
cg00073716	NC	NC	NC
cg00073751	NC	NC	NC
cg00073771	NC	NC	NC
cg00073780	NC	NC	NC
cg00073784	NC	NC	NC
cg00073794	NC	NC	NC
cg00073837	LI	LI	LI
cg00073968	NC	NC	NC
cg00073973	NC	NC	NC
cg00074086	NC	NC	NC
cg00074132	NC	NC	NC
cg00074145	NC	NC	NC
cg00074174	NC	NC	VI
cg00074184	NC	NC	NC
cg00074198	NC	NC	NC
cg00074348	NC	NC	NC
cg00074365	NC	NC	NC
cg00074369	NC	NC	NC
cg00074415	NC	NC	NC
cg00074482	NC	NC	NC
cg00074522	NC	NC	NC
cg00074568	NC	NC	NC
cg00074576	NC	NC	NC
cg00074585	NC	NC	NC
cg00074746	NC	NC	NC
cg00074782	NC	NC	NC
cg00074818	NC	NC	NC
cg00074851	NC	NC	NC
cg00075019	NC	NC	NC
cg00075034	NC	NC	NC
cg00075079	NC	NC	NC
cg00075123	NC	NC	NC
cg00075161	NC	NC	NC
cg00075192	NC	NC	NC
cg00075204	NC	NC	NC
cg00075211	NC	NC	NC
cg00075331	NC	NC	NC
cg00075467	NC	NC	NC
cg00075468	NC	NC	NC
cg00075507	LI	LI	NC
cg00075597	NC	NC	NC
cg00075615	NC	NC	NC
cg00075620	NC	NC	NC
cg00075634	NC	NC	NC
cg00075649	NC	NC	NC
cg00075735	NC	NC	NC
cg00075768	NC	NC	NC
cg00075853	NC	NC	NC
cg00075920	NC	NC	NC
cg00075956	NC	NC	NC
cg00075967	NC	NC	NC
cg00075975	NC	NC	NC
cg00076044	NC	NC	NC
cg00076056	NC	NC	NC
cg00076057	NC	NC	NC
cg00076107	NC	NC	NC
cg00076307	NC	NC	NC
cg00076325	NC	NC	NC
cg00076353	NC	NC	NC
cg00076497	NC	NC	NC
cg00076538	NC	NC	NC
cg00076555	LD	LD	LD
cg00076612	NC	NC	NC
cg00076645	NC	NC	NC
cg00076653	LD	LD	NC
cg00076774	VI	NC	NC
cg00076797	NC	NC	NC
cg00076854	NC	NC	NC
cg00076936	NC	NC	NC
cg00076998	NC	NC	NC
cg00077044	NC	NC	NC
cg00077104	NC	NC	NC
cg00077166	NC	NC	NC
cg00077183	NC	NC	NC
cg00077264	NC	NC	NC
cg00077275	NC	NC	NC
cg00077297	NC	NC	NC
cg00077304	NC	NC	NC
cg00077307	NC	NC	NC
cg00077312	NC	NC	NC
cg00077402	NC	NC	NC
cg00077426	NC	NC	NC
cg00077457	NC	NC	NC
cg00077477	NC	NC	NC
cg00077516	NC	NC	NC
cg00077547	NC	NC	NC
cg00077566	NC	NC	NC
cg00077570	NC	NC	NC
cg00077586	NC	NC	NC
cg00077606	NC	NC	NC
cg00077665	NC	NC	NC
cg00077717	NC	NC	NC
cg00077805	NC	NC	NC
cg00077838	NC	NC	NC
cg00077872	NC	NC	NC
cg00077877	NC	NC	NC
cg00077898	NC	NC	NC
cg00077904	NC	NC	NC
cg00078025	NC	NC	NC
cg00078085	NC	NC	NC
cg00078086	NC	NC	NC
cg00078105	NC	NC	NC
cg00078121	NC	NC	NC
cg00078130	NC	NC	NC
cg00078142	NC	NC	NC
cg00078146	NC	NC	NC
cg00078221	NC	NC	NC
cg00078245	LI	NC	NC
cg00078259	NC	NC	NC
cg00078318	NC	NC	NC
cg00078334	NC	NC	NC
cg00078348	NC	NC	NC
cg00078456	NC	NC	NC
cg00078513	NC	NC	NC
cg00078517	NC	NC	NC
cg00078746	NC	NC	NC
cg00078759	NC	NC	NC
cg00078770	NC	NC	NC
cg00078782	NC	NC	NC
cg00078857	NC	NC	NC
cg00078861	NC	NC	NC
cg00078911	NC	NC	NC
cg00078968	NC	NC	NC
cg00078996	NC	NC	NC
cg00079002	NC	NC	NC
cg00079019	NC	NC	NC
cg00079023	NC	NC	NC
cg00079056	NC	NC	NC
cg00079076	NC	NC	NC
cg00079169	NC	NC	NC
cg00079202	NC	NC	NC
cg00079216	NC	NC	NC
cg00079219	NC	NC	NC
cg00079224	NC	NC	NC
cg00079293	NC	NC	NC
cg00079302	NC	NC	NC
cg00079375	NC	NC	NC
cg00079388	NC	NC	NC
cg00079536	NC	NC	NC
cg00079598	NC	NC	NC
cg00079638	NC	NC	NC
cg00079643	NC	NC	NC
cg00079649	NC	NC	NC
cg00079764	NC	NC	NC
cg00079784	NC	NC	NC
cg00079785	NC	NC	NC
cg00079887	NC	NC	NC
cg00079891	NC	NC	NC
cg00080012	NC	NC	NC
cg00080059	NC	NC	NC
cg00080060	NC	NC	NC
cg00080105	NC	NC	NC
cg00080118	NC	NC	NC
cg00080123	NC	NC	NC
cg00080125	NC	NC	NC
cg00080148	NC	NC	NC
cg00080188	NC	NC	NC
cg00080312	NC	NC	NC
cg00080333	NC	NC	NC
cg00080393	NC	NC	NC
cg00080417	NC	NC	NC
cg00080418	NC	NC	NC
cg00080423	NC	NC	NC
cg00080483	LD	NC	NC
cg00080484	NC	NC	NC
cg00080485	NC	NC	NC
cg00080578	NC	NC	NC
cg00080582	NC	NC	NC
cg00080663	NC	NC	NC
cg00080706	NC	NC	NC
cg00080972	NC	NC	NC
cg00080987	NC	NC	NC
cg00081019	NC	NC	NC
cg00081084	NC	NC	NC
cg00081087	NC	NC	NC
cg00081098	NC	NC	NC
cg00081104	NC	NC	NC
cg00081128	NC	NC	NC
cg00081175	NC	NC	NC
cg00081251	NC	NC	NC
cg00081270	NC	NC	NC
cg00081324	LD	LD	LD
cg00081347	NC	NC	NC
cg00081381	NC	NC	NC
cg00081404	NC	NC	NC
cg00081425	NC	NC	NC
cg00081439	NC	NC	NC
cg00081445	NC	NC	NC
cg00081574	NC	NC	NC
cg00081602	NC	NC	NC
cg00081647	NC	NC	NC
cg00081666	NC	NC	NC
cg00081729	NC	NC	NC
cg00081799	NC	NC	NC
cg00081827	NC	NC	NC
cg00081854	NC	NC	NC
cg00081876	NC	NC	NC
cg00081919	NC	NC	NC
cg00081935	NC	NC	NC
cg00081940	NC	NC	NC
cg00081975	NC	NC	NC
cg00082012	NC	NC	NC
cg00082132	NC	NC	NC
cg00082140	NC	NC	NC
cg00082178	NC	NC	NC
cg00082182	NC	NC	NC
cg00082235	NC	NC	NC
cg00082271	LD	LD	NC
cg00082285	NC	NC	NC
cg00082310	NC	NC	NC
cg00082332	NC	NC	NC
cg00082411	NC	NC	NC
cg00082426	NC	NC	NC
cg00082472	NC	NC	NC
cg00082476	NC	NC	NC
cg00082491	NC	NC	NC
cg00082558	NC	NC	NC
cg00082640	NC	NC	NC
cg00082664	LI	NC	NC
cg00082713	NC	NC	NC
cg00082770	NC	NC	NC
cg00082833	NC	NC	NC
cg00082874	NC	NC	NC
cg00082897	NC	NC	NC
cg00082939	NC	NC	NC
cg00082998	NC	NC	NC
cg00083018	NC	NC	NC
cg00083028	NC	NC	NC
cg00083042	NC	NC	NC
cg00083046	NC	NC	NC
cg00083059	NC	NC	NC
cg00083067	NC	NC	NC
cg00083068	NC	NC	NC
cg00083072	NC	NC	NC
cg00083084	NC	NC	NC
cg00083091	NC	NC	NC
cg00083193	NC	NC	NC
cg00083194	NC	NC	NC
cg00083206	NC	NC	NC
cg00083223	NC	NC	NC
[truncated: 554,812+ more rows]

## Sheet: Males
CpG	Baseline	Model7	Model12
cg00000029	NC	NC	NC
cg00000109	NC	NC	NC
cg00000155	NC	NC	NC
cg00000158	NC	NC	NC
cg00000292	NC	NC	NC
cg00000321	NC	NC	NC
cg00000363	NC	VI	VI
cg00000540	NC	NC	NC
cg00000579	NC	NC	NC
cg00000596	NC	NC	NC
cg00000622	NC	NC	NC
cg00000658	NC	NC	NC
cg00000714	LD	NC	NC
cg00000765	NC	NC	NC
cg00000769	NC	NC	NC
cg00000905	NC	NC	NC
cg00000948	NC	NC	NC
cg00000957	NC	NC	NC
cg00000974	NC	NC	NC
cg00001099	NC	NC	NC
cg00001136	NC	NC	NC
cg00001245	NC	NC	NC
cg00001249	NC	NC	NC
cg00001269	NC	NC	NC
cg00001364	NC	NC	NC
cg00001446	NC	NC	NC
cg00001503	NC	NC	NC
cg00001506	NC	NC	NC
cg00001510	NC	NC	NC
cg00001534	NC	NC	NC
cg00001582	NC	NC	NC
cg00001583	LI	LI	LI
cg00001594	NC	NC	NC
cg00001610	NC	NC	NC
cg00001636	NC	NC	NC
cg00001687	NC	NC	NC
cg00001747	NC	NC	NC
cg00001755	NC	NC	NC
cg00001784	NC	NC	NC
cg00001791	NC	NC	NC
cg00001809	NC	LD	NC
cg00001814	NC	NC	NC
cg00001854	NC	NC	NC
cg00001874	NC	NC	NC
cg00001930	NC	NC	NC
cg00001997	NC	NC	NC
cg00002028	NC	NC	NC
cg00002033	NC	NC	NC
cg00002080	NC	NC	NC
cg00002116	NC	NC	NC
cg00002145	NC	NC	NC
cg00002176	VI	VI	NC
cg00002186	NC	NC	NC
cg00002190	NC	NC	NC
cg00002224	NC	NC	NC
cg00002236	NC	NC	NC
cg00002350	NC	NC	NC
cg00002366	NC	NC	NC
cg00002398	NC	NC	NC
cg00002406	NC	NC	NC
cg00002426	NC	NC	NC
cg00002444	NC	NC	NC
cg00002449	NC	NC	NC
cg00002464	NC	NC	NC
cg00002490	NC	NC	NC
cg00002531	NC	NC	NC
cg00002559	NC	NC	NC
cg00002591	NC	NC	NC
cg00002593	NC	NC	NC
cg00002646	NC	NC	NC
cg00002660	NC	NC	NC
cg00002684	LD	NC	LD
cg00002719	NC	NC	NC
cg00002769	NC	NC	NC
cg00002776	NC	NC	NC
cg00002780	NC	NC	NC
cg00002808	NC	NC	NC
cg00002809	NC	NC	NC
cg00002810	NC	NC	NC
cg00002837	NC	NC	NC
cg00002907	NC	NC	NC
cg00002934	NC	NC	NC
cg00003009	NC	NC	NC
cg00003014	NC	NC	NC
cg00003036	NC	NC	NC
cg00003091	NC	NC	NC
cg00003167	NC	NC	NC
cg00003202	NC	NC	NC
cg00003287	NC	NC	NC
cg00003298	NC	NC	NC
cg00003345	LD	LD	LD
cg00003407	NC	NC	NC
cg00003513	NC	NC	NC
cg00003555	NC	NC	NC
cg00003578	NC	NC	NC
cg00003625	NC	NC	NC
cg00003722	NC	NC	NC
cg00003758	NC	NC	NC
cg00003784	NC	NC	NC
cg00003858	NC	NC	NC
cg00003911	NC	NC	NC
cg00003937	NC	NC	NC
cg00003944	NC	NC	NC
cg00003965	NC	NC	NC
cg00003994	NC	NC	NC
cg00004055	NC	NC	NC
cg00004067	NC	NC	NC
cg00004072	NC	NC	NC
cg00004082	NC	NC	NC
cg00004089	NC	NC	NC
cg00004105	LD	LD	LD
cg00004175	NC	NC	NC
cg00004207	NC	NC	NC
cg00004255	NC	NC	NC
cg00004257	NC	NC	NC
cg00004429	NC	NC	NC
cg00004438	NC	NC	NC
cg00004454	NC	NC	NC
cg00004533	NC	NC	NC
cg00004608	NC	NC	NC
cg00004633	NC	NC	NC
cg00004700	NC	NC	NC
cg00004723	NC	NC	NC
cg00004778	NC	LD	NC
cg00004806	NC	NC	NC
cg00004836	NC	NC	NC
cg00004883	NC	NC	NC
cg00004905	NC	NC	NC
cg00004915	NC	NC	NC
cg00004939	NC	NC	NC
cg00004979	NC	NC	NC
cg00004996	NC	LI	NC
cg00005010	NC	NC	NC
cg00005072	NC	NC	NC
cg00005077	NC	NC	NC
cg00005112	NC	NC	NC
cg00005166	NC	NC	NC
cg00005249	NC	NC	NC
cg00005297	NC	NC	NC
cg00005306	NC	NC	NC
cg00005325	NC	NC	NC
cg00005354	NC	NC	NC
cg00005423	NC	NC	NC
cg00005437	NC	NC	NC
cg00005440	LD	NC	NC
cg00005461	LD	NC	NC
cg00005541	NC	NC	NC
cg00005543	NC	NC	NC
cg00005597	NC	NC	NC
cg00005619	NC	NC	NC
cg00005622	NC	NC	NC
cg00005631	NC	NC	NC
cg00005644	NC	NC	NC
cg00005734	NC	NC	NC
cg00005740	NC	NC	NC
cg00005849	NC	NC	NC
cg00005861	NC	NC	NC
cg00005888	NC	NC	NC
cg00005893	NC	NC	NC
cg00006032	NC	NC	NC
cg00006040	NC	NC	NC
cg00006081	LI	LI	NC
cg00006122	NC	NC	NC
cg00006166	NC	NC	NC
cg00006183	NC	NC	NC
cg00006299	NC	NC	NC
cg00006387	NC	NC	NC
cg00006397	NC	NC	NC
cg00006414	NC	NC	NC
cg00006600	NC	NC	NC
cg00006609	NC	NC	NC
cg00006626	NC	NC	NC
cg00006713	NC	NC	NC
cg00006735	NC	NC	NC
cg00006787	NC	NC	NC
cg00006884	NC	NC	NC
cg00006899	NC	NC	NC
cg00006926	NC	NC	NC
cg00006948	NC	NC	NC
cg00007032	NC	NC	NC
cg00007064	NC	NC	NC
cg00007076	NC	NC	NC
cg00007127	NC	NC	NC
cg00007221	NC	NC	NC
cg00007226	NC	NC	NC
cg00007239	NC	NC	NC
cg00007266	NC	NC	NC
cg00007269	NC	NC	NC
cg00007300	NC	NC	NC
cg00007324	NC	NC	NC
cg00007326	NC	NC	NC
cg00007420	NC	NC	NC
cg00007426	NC	NC	NC
cg00007466	NC	NC	NC
cg00007540	NC	NC	NC
cg00007644	NC	NC	NC
cg00007675	NC	NC	NC
cg00007898	NC	NC	NC
cg00007932	NC	NC	NC
cg00007981	NC	NC	NC
cg00007987	NC	NC	NC
cg00008004	NC	NC	NC
cg00008033	LI	LI	LI
cg00008036	NC	NC	NC
cg00008075	NC	NC	NC
cg00008282	NC	NC	NC
cg00008345	NC	NC	NC
cg00008387	NC	NC	NC
cg00008404	NC	NC	NC
cg00008446	NC	NC	NC
cg00008488	NC	NC	NC
cg00008493	NC	NC	NC
cg00008500	NC	NC	NC
cg00008564	NC	NC	NC
cg00008621	NC	NC	NC
cg00008647	NC	NC	NC
cg00008665	NC	NC	NC
cg00008671	NC	NC	NC
cg00008695	NC	NC	NC
cg00008713	NC	NC	NC
cg00008737	NC	NC	NC
cg00008795	NC	NC	NC
cg00008810	NC	NC	NC
cg00008819	NC	NC	NC
cg00008916	NC	NC	NC
cg00008956	NC	NC	NC
cg00008971	NC	NC	NC
cg00009053	NC	NC	NC
cg00009167	NC	NC	NC
cg00009200	NC	NC	NC
cg00009214	NC	NC	NC
cg00009293	NC	NC	NC
cg00009364	NC	NC	NC
cg00009407	NC	NC	NC
cg00009412	NC	NC	NC
cg00009421	NC	NC	NC
cg00009528	NC	NC	NC
cg00009556	NC	NC	NC
cg00009629	NC	NC	NC
cg00009644	NC	NC	NC
cg00009737	NC	NC	NC
cg00009750	NC	NC	NC
cg00009786	NC	NC	NC
cg00009834	NC	NC	NC
cg00009871	LD	NC	NC
cg00009919	NC	NL	NC
cg00009922	NC	NC	NC
cg00009944	NC	NC	NC
cg00009945	NC	NC	NC
cg00010046	NC	NC	NC
cg00010078	NC	NC	NC
cg00010108	NC	NC	NC
cg00010168	NC	NC	NC
cg00010266	NC	NC	NC
cg00010288	NC	NC	NC
cg00010445	NC	LI	NC
cg00010506	NC	NC	NC
cg00010533	NC	NC	NC
cg00010654	NC	NC	NC
cg00010664	NC	NC	NC
cg00010734	NC	NC	NC
cg00010738	NC	NC	NC
cg00010789	NC	NC	NC
cg00010848	NC	NC	NC
cg00010890	NC	NC	NC
cg00010900	NC	NC	NC
cg00010940	NC	NC	NC
cg00010946	NC	NC	NC
cg00010947	NC	NC	NC
cg00010992	NC	NC	NC
cg00011113	LD	NC	NC
cg00011122	NC	NC	NC
cg00011203	NC	NC	NC
cg00011225	NC	NC	NC
cg00011239	NC	NC	NC
cg00011247	NC	NC	NC
cg00011274	NC	NC	NC
cg00011284	NC	NC	NC
cg00011350	NC	NC	NC
cg00011459	NC	NC	NC
cg00011460	NC	NC	NC
cg00011461	NC	NC	NC
cg00011482	NC	NC	NC
cg00011564	NC	NC	NC
cg00011574	NC	NC	NC
cg00011578	NC	NC	NC
cg00011605	NC	NC	NC
cg00011616	NC	NC	NC
cg00011717	NC	NC	NC
cg00011740	NC	NC	NC
cg00011754	NC	NC	NC
cg00011762	NC	NC	NC
cg00011777	NC	NC	NC
cg00011794	NC	NC	NC
cg00011855	NC	NC	NC
cg00011861	NC	NC	NC
cg00011924	NC	NC	NC
cg00012036	NC	NC	NC
cg00012100	NC	NC	NC
cg00012126	NC	NC	NC
cg00012168	NC	NC	NC
cg00012194	NC	NC	NC
cg00012199	NC	NC	NC
cg00012203	NC	NC	NC
cg00012362	NC	NC	NC
cg00012386	NC	NC	NC
cg00012397	NC	NC	NC
cg00012469	NC	NC	NC
cg00012521	NC	NC	NC
cg00012522	NC	NC	NC
cg00012529	NC	NC	NC
cg00012536	NC	NC	NC
cg00012576	NC	LD	NC
cg00012587	NC	NC	NC
cg00012667	NC	NC	NC
cg00012692	NC	NC	NC
cg00012698	NC	NC	NC
cg00012701	NC	NC	NC
cg00012761	NC	NC	NC
cg00012762	NC	NC	NC
cg00012824	LD	NC	NC
cg00012840	NC	NC	NC
cg00012920	NC	NC	NC
cg00012992	NC	NC	NC
cg00013015	NC	NC	NC
cg00013301	NC	NC	NC
cg00013302	NC	NC	NC
cg00013369	NC	NC	NC
cg00013374	NC	NC	NC
cg00013386	NC	NC	NC
cg00013409	NC	NC	NC
cg00013410	NC	NC	NC
cg00013441	NC	NC	NC
cg00013451	NC	NC	NC
cg00013475	NC	NC	NC
cg00013530	NC	NC	NC
cg00013569	NC	NC	NC
cg00013618	NC	NL	NC
cg00013660	NC	NC	NC
cg00013677	NC	NC	NC
cg00013684	NC	NC	NC
cg00013688	NC	NC	NC
cg00013702	NC	NC	NC
cg00013733	NC	NC	NC
cg00013759	NC	NC	NC
cg00013809	NC	NC	NC
cg00013831	NC	NC	NC
cg00013899	NC	NC	NC
cg00014020	NC	NC	NC
cg00014085	NC	NC	NC
cg00014104	NC	NC	NC
cg00014112	NC	NC	NC
cg00014118	NC	NC	NC
cg00014168	NC	NC	NC
cg00014176	NC	NC	NC
cg00014194	NC	NC	NC
cg00014272	NC	NC	NC
cg00014278	NC	NC	NC
cg00014285	NC	NC	NC
cg00014289	NC	NC	NC
cg00014301	NC	NC	NC
cg00014327	NC	NC	NC
cg00014333	NC	NC	NC
cg00014380	NC	NC	NC
cg00014434	NC	NC	NC
cg00014445	NC	NC	NC
cg00014484	NC	NC	NC
cg00014665	NC	NC	NC
cg00014733	NC	NC	NC
cg00014786	NC	NC	NC
cg00014806	NC	NC	NC
cg00014830	NC	NC	NC
cg00014837	NC	NC	NC
cg00014848	NC	NC	NC
cg00014893	NC	NC	NC
cg00014900	NC	NC	NC
cg00014931	NC	NC	NC
cg00014986	NC	NC	NC
cg00014991	NC	NC	NC
cg00014996	NC	NC	NC
cg00015002	NC	NC	NC
cg00015024	NC	NC	NC
cg00015058	NC	NC	NC
cg00015081	NC	NC	NC
cg00015121	NC	NC	NC
cg00015189	NC	NC	NC
cg00015193	NC	NC	NC
cg00015219	NC	NC	NC
cg00015289	NC	NC	NC
cg00015343	NC	NC	NC
cg00015373	NC	NC	NC
cg00015603	NC	NC	NC
cg00015629	NC	NC	NC
cg00015639	NC	NC	NC
cg00015664	NC	NC	NC
cg00015699	NC	NC	NC
cg00015770	NC	NC	NC
cg00015791	NC	NC	NC
cg00015798	NC	NC	NC
cg00015801	NC	NC	NC
cg00015838	NC	NC	NC
cg00015930	NC	NC	NC
cg00015991	NC	NC	NC
cg00016012	NC	NC	NC
cg00016048	NC	NC	NC
cg00016066	NC	NC	NC
cg00016127	NC	NC	NC
cg00016156	NC	NC	NC
cg00016223	NC	NC	NC
cg00016226	NC	NC	NC
cg00016255	LD	LD	NC
cg00016360	NC	NC	NC
cg00016406	NC	NC	NC
cg00016439	NC	NC	NC
cg00016481	NC	NC	NC
cg00016498	NC	NC	NC
cg00016538	NC	NC	NC
cg00016576	NC	NC	NC
cg00016593	NC	NC	NC
cg00016783	NC	NC	NC
cg00016841	NC	NC	NC
cg00016892	NC	NC	NC
cg00016913	NC	NC	NC
cg00016968	LD	LD	LD
cg00017002	NC	NC	NC
cg00017033	NC	NC	NC
cg00017188	NC	NC	NC
cg00017203	NC	NC	NC
cg00017271	NC	NC	NC
cg00017362	NC	NC	NC
cg00017363	NC	NC	NC
cg00017441	NC	NC	NC
cg00017461	NC	NC	NC
cg00017475	NC	NC	NC
cg00017489	NC	NC	NC
cg00017507	NC	NC	NC
cg00017557	NC	NC	NC
cg00017562	NC	NC	NC
cg00017601	NC	NC	NC
cg00017630	NC	NC	NC
cg00017709	NC	NC	NC
cg00017826	LI	NC	NC
cg00017842	NC	NC	NC
cg00017851	NC	NC	NC
cg00017931	NC	NC	NC
cg00017970	NC	NC	NC
cg00018010	NC	NC	NC
cg00018024	NC	NC	NC
cg00018103	NC	NC	NC
cg00018107	NC	NC	NC
cg00018128	NC	NC	NC
cg00018179	LD	LD	NC
cg00018216	NC	NC	NC
cg00018229	NC	NC	NC
cg00018305	NC	NC	NC
cg00018443	NC	NC	NC
cg00018524	NC	NC	NC
cg00018539	NC	NC	NC
cg00018557	NC	NC	NC
cg00018572	NC	NC	NC
cg00018606	NC	NC	NC
cg00018635	NC	NC	NC
cg00018667	NC	NC	NC
cg00018674	NC	NC	NC
cg00018682	NC	NC	NC
cg00018739	NC	NC	NC
cg00018758	NC	NC	NC
cg00018828	NC	NC	NC
cg00018845	LI	LI	NC
cg00018850	NC	NC	NC
cg00019082	NC	NC	NC
cg00019093	NC	NC	NC
cg00019118	NC	NC	NC
cg00019137	NC	NC	NC
cg00019141	NC	NC	NC
cg00019275	NC	NC	NC
cg00019301	NC	NC	NC
cg00019308	NC	NC	NC
cg00019366	NC	NC	NC
cg00019377	NC	NC	NC
cg00019458	NC	NC	NC
cg00019511	NC	NC	NC
cg00019553	NC	NC	NC
cg00019576	NC	NC	NC
cg00019607	NC	NC	NC
cg00019654	NC	NC	NC
cg00019678	NC	NC	NC
cg00019746	NC	NC	NC
cg00019759	LI	LI	LI
cg00019809	NC	NC	NC
cg00019826	NC	NC	NC
cg00019841	NC	NC	NC
cg00019877	NC	NC	NC
cg00020052	NC	NC	NC
cg00020063	NC	NC	NC
cg00020133	NC	NC	NC
cg00020229	NC	NC	NC
cg00020297	NC	NC	NC
cg00020340	NC	NC	NC
cg00020348	NC	NC	NC
cg00020390	NC	NC	NC
cg00020419	NC	NC	NC
cg00020450	NC	NC	NC
cg00020474	NC	LI	LI
cg00020617	NC	NC	NC
cg00020622	NC	NC	NC
cg00020649	NC	NC	NC
cg00020720	NC	NC	NC
cg00020794	NC	NC	NC
cg00020799	NC	NC	NC
cg00020807	NC	NC	NC
cg00020864	NC	NC	NC
cg00020967	NC	NC	NC
cg00020991	LD	LD	LD
cg00021028	NC	NC	NC
cg00021030	NC	NC	NC
cg00021108	NC	NC	NC
cg00021152	NC	NC	NC
cg00021166	NC	NC	NC
cg00021237	NC	NC	NC
cg00021242	NC	NC	NC
cg00021256	NC	NC	NC
cg00021264	NC	NC	NC
cg00021275	NC	NC	NC
cg00021325	NC	NC	NC
cg00021413	NC	NC	NC
cg00021476	NC	NC	NC
cg00021513	NC	NC	NC
cg00021527	NC	NC	NC
cg00021539	NC	NC	NC
cg00021540	NC	NC	NC
cg00021550	NC	NC	NC
cg00021576	NC	NC	NC
cg00021581	NC	NC	NC
cg00021663	NC	NC	NC
cg00021762	NC	NC	NC
cg00021764	NC	NC	NC
cg00021766	NC	NC	NC
cg00021783	NC	NC	NC
cg00021853	NC	NC	NC
cg00021855	NC	NC	NC
cg00021892	NC	NC	NC
cg00021895	NC	NC	NC
cg00021933	NC	NC	NC
cg00021944	NC	NC	NC
cg00022021	NC	NC	NC
cg00022024	NC	NC	NC
cg00022054	NC	NC	NC
cg00022059	NC	NC	NC
cg00022076	NC	NC	NC
cg00022101	NC	NC	NC
cg00022138	NC	NC	NC
cg00022145	NC	NC	NC
cg00022218	NC	NC	NC
cg00022235	NC	NC	NC
cg00022259	NC	NC	NC
cg00022308	NC	NC	NC
cg00022318	NC	NC	NC
cg00022401	NC	NC	NC
cg00022492	NC	NC	NC
cg00022594	NC	NC	NC
cg00022633	NC	NC	NC
cg00022642	NC	NC	NC
cg00022688	NC	NC	NC
cg00022826	NC	NC	NC
cg00022866	NC	NC	NC
cg00022871	NC	LD	NC
cg00022911	NC	NC	NC
cg00023001	NC	NC	NC
cg00023056	NC	NC	NC
cg00023132	NC	NC	NC
cg00023154	NC	NC	NC
cg00023168	NC	NC	NC
cg00023174	NC	NC	NC
cg00023185	NC	NC	NC
cg00023196	NC	NC	NC
cg00023197	LI	LI	LI
cg00023231	LD	NC	NC
cg00023233	NC	NC	NC
cg00023288	NC	NC	NC
cg00023301	NC	NC	NC
cg00023321	NC	NC	NC
cg00023345	NC	NC	NC
cg00023351	NC	NC	NC
cg00023363	NC	NC	NC
cg00023411	NC	NC	NC
cg00023464	NC	NC	NC
cg00023523	NC	NC	NC
cg00023648	NC	NC	NC
cg00023673	NC	NC	NC
cg00023695	NC	NC	NC
cg00023726	NC	NC	NC
cg00023728	NC	NC	NC
cg00023804	NC	NC	NC
cg00023808	NC	NC	NC
cg00023826	NC	NC	NC
cg00023916	NC	NC	NC
cg00023919	NC	NC	NC
cg00024086	NC	LI	NC
cg00024102	NC	NC	NC
cg00024244	NC	NC	NC
cg00024269	LI	NC	NC
cg00024280	NC	NC	NC
cg00024304	NC	NC	NC
cg00024361	NC	NC	NC
cg00024367	NC	NC	NC
cg00024377	NC	NC	NC
cg00024396	NC	NC	NC
cg00024404	NC	NC	NC
cg00024416	NC	NC	NC
cg00024437	NC	NC	NC
cg00024443	NC	NC	NC
cg00024456	NC	NC	NC
cg00024471	NC	NC	NC
cg00024472	NC	NC	NC
cg00024494	NC	NC	NC
cg00024515	NC	NC	NC
cg00024674	NC	LD	NC
cg00024701	NC	NC	NC
cg00024705	NC	NC	NC
cg00024722	NC	NC	NC
cg00024740	NC	NC	NC
cg00024790	NC	NC	NC
cg00024792	NC	NC	NC
cg00024812	NC	NC	NC
cg00024870	NC	NC	NC
cg00024937	NC	NC	NC
cg00024967	NC	NC	NC
cg00024989	NC	NC	NC
cg00024998	NC	NC	NC
cg00025138	NC	NC	NC
cg00025211	NC	NC	NC
cg00025216	NC	NC	NC
cg00025278	NC	NL	NC
cg00025328	NC	NC	NC
cg00025347	NC	NC	NC
cg00025357	NC	NC	NC
cg00025405	NC	NC	NC
cg00025436	NC	NC	NC
cg00025496	NC	NC	NC
cg00025526	NC	NC	NC
cg00025590	NC	NC	NC
cg00025591	NC	NC	NC
cg00025626	NC	NC	NC
cg00025643	NC	NC	NC
cg00025663	NC	NC	NC
cg00025715	NC	NC	NC
cg00025795	NC	NC	NC
cg00025823	NC	NC	NC
cg00025877	NC	NC	NC
cg00025981	NC	NC	NC
cg00025982	NC	NC	NC
cg00025991	NC	NC	NC
cg00026030	NC	NC	NC
cg00026104	NC	NC	NC
cg00026119	NC	NC	NC
cg00026141	NC	NC	NC
cg00026183	NC	NC	NC
cg00026222	NC	NC	NC
cg00026230	NC	NC	NC
cg00026239	NC	NC	NC
cg00026290	NC	NC	NC
cg00026302	NC	NC	NC
cg00026362	NC	NC	NC
cg00026363	NC	NC	NC
cg00026374	NC	NC	NC
cg00026401	NC	NC	NC
cg00026412	NC	NC	NC
cg00026455	NC	NC	NC
cg00026472	NC	NC	NC
cg00026474	NC	LD	NC
cg00026554	NC	NC	NC
cg00026570	NC	NC	NC
cg00026703	NC	NC	NC
cg00026729	NC	NC	NC
cg00026731	NC	NC	NC
cg00026803	NC	NC	NC
cg00026853	NC	NC	NC
cg00026891	LD	NC	NC
cg00026920	NC	NC	NC
cg00026974	NC	NC	NC
cg00027029	NC	NC	NC
cg00027038	NC	NC	NC
cg00027083	NC	LI	NC
cg00027114	NC	NC	NC
cg00027162	NC	NC	NC
cg00027232	NC	NC	NC
cg00027400	LI	LI	LI
cg00027466	NC	NC	NC
cg00027499	NC	NC	NC
cg00027570	NC	NC	NC
cg00027586	NC	NC	NC
cg00027619	NC	NC	NC
cg00027669	NC	NC	NC
cg00027674	NC	LI	NC
cg00027712	NC	NC	NC
cg00027729	NC	NC	NC
cg00027745	NC	NC	NC
cg00027940	LD	NC	NC
cg00027948	NC	NC	NC
cg00027990	NC	NC	NC
cg00027995	NC	NC	NC
cg00028013	LD	NC	NC
cg00028034	NC	NC	NC
cg00028056	NC	NC	NC
cg00028135	LD	NC	NC
cg00028184	NC	NC	NC
cg00028211	NC	NC	NC
cg00028336	NC	NC	NC
cg00028338	NC	NC	NC
cg00028429	NC	NC	NC
cg00028455	NC	NC	NC
cg00028480	NC	NC	NC
cg00028487	NC	NC	NC
cg00028507	LD	NC	NC
cg00028515	NC	NC	NC
cg00028595	NC	NC	NC
cg00028636	NC	NC	NC
cg00028677	NC	NC	NC
cg00028749	NC	NC	NC
cg00028757	NC	NC	NC
cg00028813	NC	NC	NC
cg00028829	NC	NC	NC
cg00028844	NC	NC	NC
cg00028870	NC	NC	NC
cg00028881	NC	NC	NC
cg00028918	NC	NC	NC
cg00028929	NC	NC	NC
cg00028935	NC	NC	NC
cg00028993	NC	NC	NC
cg00029031	NC	NC	NC
cg00029150	NC	NC	NC
cg00029161	NC	NC	NC
cg00029229	NC	NC	NC
cg00029233	NC	NC	NC
cg00029256	NC	NC	NC
cg00029284	LD	NC	NC
cg00029353	NC	NC	NC
cg00029397	NC	NC	NC
cg00029458	NC	NC	NC
cg00029465	NC	NC	NC
cg00029521	NC	NL	NC
cg00029587	NC	NL	NC
cg00029640	NC	NC	NC
cg00029647	NC	NC	NC
cg00029648	NC	NC	NC
cg00029678	NC	NC	NC
cg00029694	NC	NC	NC
cg00029812	NC	NC	NC
cg00029822	NC	NC	NC
cg00029825	NC	NC	NC
cg00029831	NC	NC	NC
cg00029922	NC	NC	NC
cg00029943	NC	NC	NC
cg00029973	NC	NC	NC
cg00029979	NC	NC	NC
cg00030005	NC	NC	NC
cg00030047	NC	NC	NC
cg00030074	NC	NC	NC
cg00030290	NC	NC	NC
cg00030291	NC	NC	NC
cg00030296	NC	NC	NC
cg00030420	LI	LI	NC
cg00030422	NC	NC	NC
cg00030427	NC	NC	NC
cg00030432	NC	NC	NC
cg00030466	NC	NC	NC
cg00030501	NC	NC	NC
cg00030508	NC	NC	NC
cg00030588	NC	LD	NC
cg00030591	NC	NC	NC
cg00030604	NC	NC	NC
cg00030627	NC	NC	NC
cg00030795	NC	NC	NC
cg00030816	NC	NC	NC
cg00031013	NC	NC	NC
cg00031059	NC	NC	NC
cg00031063	NC	NC	NC
cg00031105	LD	NC	NC
cg00031162	NC	NC	NC
cg00031165	NC	NC	NC
cg00031187	NC	NC	NC
cg00031256	NC	NC	NC
cg00031277	NC	NC	NC
cg00031340	NC	NC	NC
cg00031402	NC	NC	NC
cg00031443	NC	NC	NC
cg00031456	NC	NC	NC
cg00031491	NC	NC	NC
cg00031568	LI	NC	NC
cg00031663	NC	NC	NC
cg00031708	NC	NC	NC
cg00031779	NC	NC	NC
cg00031803	NC	NC	NC
cg00031823	LD	LD	LD
cg00031896	NC	NC	NC
cg00031999	NC	NC	NC
cg00032094	NC	NC	NC
cg00032173	NC	NC	NC
cg00032192	NC	NC	NC
cg00032227	NC	NC	NC
cg00032336	NC	NC	NC
cg00032366	NC	NC	NC
cg00032391	NC	NC	NC
cg00032458	NC	NC	NC
cg00032544	NC	NC	NC
cg00032576	NC	NC	NC
cg00032609	NC	NC	NC
cg00032610	NC	NC	NC
cg00032637	NC	NC	NC
cg00032664	NC	NC	NC
cg00032703	NC	NC	NC
cg00032756	NC	NC	NC
cg00032789	NC	NC	NC
cg00032805	NC	LI	NC
cg00032879	NC	NC	NC
cg00032884	NC	NC	NC
cg00032912	NC	NC	NC
cg00032923	NC	NC	NC
cg00032956	NC	NC	NC
cg00032959	NC	NC	NC
cg00033066	NC	NC	NC
cg00033127	NC	NC	NC
cg00033155	NC	NC	NC
cg00033220	NC	NC	NC
cg00033304	NC	NC	NC
cg00033334	NC	NC	NC
cg00033440	NC	NC	NC
cg00033450	NC	NC	NC
cg00033457	NC	NC	NC
cg00033490	NC	NC	NC
cg00033533	NC	NC	NC
cg00033551	NC	NC	NC
cg00033580	NC	NC	NC
cg00033623	NC	NC	NC
cg00033643	NC	NC	NC
cg00033666	NC	NC	NC
cg00033668	NC	NC	NC
cg00033678	NC	NC	NC
cg00033748	NC	NC	NC
cg00033750	NC	NC	NC
cg00033773	NC	NC	NC
cg00033806	NC	NC	NC
cg00033818	NC	NC	NC
cg00033834	NC	NC	NC
cg00033877	NC	NC	NC
cg00033950	NC	NC	NC
cg00033992	NC	NC	NC
cg00034003	NC	NC	NC
cg00034019	NC	NC	NC
cg00034039	NC	NC	NC
cg00034076	LI	LI	LI
cg00034101	LI	NC	NC
cg00034130	NC	NC	NC
cg00034241	NC	NC	NC
cg00034300	NC	NC	NC
cg00034316	NC	NC	NC
cg00034336	NC	NC	NC
cg00034360	NC	NC	NC
cg00034376	NC	NC	NC
cg00034416	NC	NC	NC
cg00034425	NC	NC	NC
cg00034433	NC	NC	NC
cg00034555	NC	NC	NC
cg00034559	NC	NC	NC
cg00034574	NC	NC	NC
cg00034604	NC	NC	NC
cg00034611	NC	NC	NC
cg00034635	NC	NC	NC
cg00034650	NC	NC	NC
cg00034755	NC	NC	NC
cg00034769	NC	NC	NC
cg00034781	NC	NC	NC
cg00034798	NC	NC	NC
cg00034823	NC	NC	NC
cg00035000	NC	NC	NC
cg00035074	NC	NC	NC
cg00035083	NC	NC	NC
cg00035197	NC	NC	NC
cg00035237	NC	NC	NC
cg00035249	NC	NC	NC
cg00035268	NC	NC	NC
cg00035316	NC	NC	NC
cg00035348	NC	NC	NC
cg00035389	NC	NC	NC
cg00035505	NC	NC	NC
cg00035526	NC	NC	NC
cg00035623	NC	NC	NC
cg00035630	NC	NC	NC
cg00035636	NC	NC	NC
cg00035673	NC	NC	NC
cg00035812	NC	NC	NC
cg00035847	NC	NC	NC
cg00035869	NC	NC	NC
cg00035889	NC	NC	NC
cg00035923	NC	NC	NC
cg00035934	NC	NC	NC
cg00035937	LD	LD	NC
cg00035945	NC	NC	NC
cg00035969	NC	NC	NC
cg00035980	NC	NC	NC
cg00036011	NC	NC	NC
cg00036110	NC	NC	NC
cg00036115	NC	NC	NC
cg00036119	NC	NC	NC
cg00036137	NC	NC	NC
cg00036258	NC	NC	NC
cg00036263	NC	NC	NC
cg00036279	NC	NC	NC
cg00036324	NC	NC	NC
cg00036328	NC	NC	NC
cg00036347	NC	NC	NC
cg00036352	NC	NC	NC
cg00036440	NC	NC	NC
cg00036558	LD	NC	NC
cg00036570	NC	NC	NC
cg00036585	NC	NC	NC
cg00036588	NC	NC	NC
cg00036619	NC	NC	NC
cg00036664	NC	NC	NC
cg00036710	NC	NC	NC
cg00036723	NC	NC	NC
cg00036732	LD	LD	LD
cg00036871	LD	NC	NC
cg00036976	NC	NC	NC
cg00037013	NC	NC	NC
cg00037026	NC	NC	NC
cg00037131	NC	NC	NC
cg00037153	NC	NC	NC
cg00037186	NC	NC	NC
cg00037188	NC	NC	NC
cg00037223	NC	NC	NC
cg00037314	NC	NC	NC
cg00037388	NC	NC	NC
cg00037400	NC	NC	NC
cg00037406	NC	NC	NC
cg00037441	NC	LI	NC
cg00037457	NC	NC	NC
cg00037458	NC	NC	NC
cg00037755	NC	NC	NC
cg00037763	NC	NC	NC
cg00037930	NC	NC	NC
cg00037940	NC	NC	NC
cg00037952	NC	NC	NC
cg00038046	NC	NC	NC
cg00038167	NC	NC	NC
cg00038193	NC	NC	NC
cg00038239	NC	NC	NC
cg00038298	NC	NC	NC
cg00038342	NC	NC	NC
cg00038358	NC	NC	NC
cg00038376	NC	NC	NC
cg00038436	NC	NC	NC
cg00038446	NC	NC	NC
cg00038450	NC	NC	NC
cg00038675	NC	NC	NC
cg00038681	NC	NC	NC
cg00038688	NC	NC	NC
cg00038736	NC	NC	NC
cg00038760	NC	NC	NC
cg00038877	NC	NC	NC
cg00038997	NC	NC	NC
cg00039016	NC	NC	NC
cg00039044	NC	NC	NC
cg00039048	NC	NC	NC
cg00039057	NC	NC	NC
cg00039070	NC	NC	NC
cg00039129	NC	NC	NC
cg00039142	LD	LD	NC
cg00039170	LI	NC	NC
cg00039177	NC	NC	NC
cg00039180	NC	NC	NC
cg00039279	NC	NC	NC
cg00039326	LD	LD	LD
cg00039441	NC	NC	NC
cg00039463	NC	NC	NC
cg00039478	NC	NC	NC
cg00039480	NC	NC	NC
cg00039505	NC	NC	NC
cg00039627	NC	NC	NC
cg00039649	NC	NC	NC
cg00039672	NC	NC	NC
cg00039793	NC	NC	NC
cg00039794	NC	NC	NC
cg00039795	NC	NC	NC
cg00039840	NC	NL	NC
cg00039845	NC	NC	NC
cg00039864	NC	NC	NC
cg00039913	NC	NC	NC
cg00039945	LD	LD	LD
cg00039998	NC	NC	NC
cg00040007	NC	NC	NC
cg00040008	NC	NC	NC
cg00040278	NC	NC	NC
cg00040288	NC	NC	NC
cg00040312	NC	NC	NC
cg00040322	NC	NC	NC
cg00040367	NC	NC	NC
cg00040380	NC	NC	NC
cg00040393	NC	NC	NC
cg00040423	NC	NC	NC
cg00040426	NC	NC	NC
cg00040427	NC	NC	NC
cg00040466	NC	NC	NC
cg00040504	NC	NC	NC
cg00040566	NC	NC	NC
cg00040569	NC	NC	NC
cg00040575	LD	LD	LD
cg00040588	NC	NC	NC
cg00040590	NC	NC	NC
cg00040688	NC	NC	NC
cg00040708	NC	NC	NC
cg00040738	LD	NC	NC
cg00040744	NC	NC	NC
cg00040749	NC	NC	NC
cg00040781	NC	NC	NC
cg00040861	NC	NC	NC
cg00040862	NC	NC	NC
cg00040873	NC	NC	NC
cg00040945	NC	NC	NC
cg00040986	NC	NC	NC
cg00041014	NC	NC	NC
cg00041030	NC	NC	NC
cg00041083	NC	NC	NC
cg00041084	NC	NC	NC
cg00041270	NC	NL	NC
cg00041328	NC	NC	NC
cg00041368	NC	NC	NC
cg00041401	NC	NC	NC
cg00041515	NC	NC	NC
cg00041575	NC	NC	NC
cg00041599	NC	NC	NC
cg00041636	NC	NC	NC
cg00041666	NC	NC	NC
cg00041829	NC	NC	NC
cg00041865	NC	NC	NC
cg00041872	NC	NC	NC
cg00041873	NC	NC	NC
cg00041898	NC	NC	NC
cg00041901	NC	NC	NC
cg00041903	NC	NC	NC
cg00041980	NC	NC	NC
cg00041989	NC	NC	NC
cg00041995	NC	NC	NC
cg00042059	NC	NC	NC
cg00042080	NC	NC	NC
cg00042081	NC	NC	NC
cg00042144	NC	NC	NC
cg00042186	NC	NC	NC
cg00042205	NC	NC	NC
cg00042244	LD	NC	NC
cg00042263	NC	NC	NC
cg00042325	NC	NC	NC
cg00042335	NC	NC	NC
cg00042356	NC	NC	NC
cg00042419	NC	NC	NC
cg00042433	NC	NC	NC
cg00042478	NC	NC	NC
cg00042650	NC	NC	NC
cg00042654	LD	NL	NC
cg00042683	NC	NC	NC
cg00042733	NC	NC	NC
cg00042810	NC	NC	NC
cg00042837	NC	NC	NC
cg00042874	NC	NC	NC
cg00042882	NC	NC	NC
cg00042896	LD	NC	NC
cg00042969	NC	NC	NC
cg00042994	NC	NC	NC
cg00043005	NC	NC	NC
cg00043080	NC	NC	NC
cg00043095	NC	NC	NC
cg00043234	NC	NC	NC
cg00043265	NC	NC	NC
cg00043284	NC	NC	NC
cg00043347	NC	NC	NC
cg00043364	NC	NC	NC
cg00043371	NC	NC	NC
cg00043379	NC	NC	NC
cg00043444	NC	NC	NC
cg00043564	NC	NC	NC
cg00043591	NC	NC	NC
cg00043599	NC	NC	NC
cg00043664	NC	NC	NC
cg00043771	NC	LD	NC
cg00043784	NC	NC	NC
cg00043788	NC	NC	NC
cg00043790	NC	NC	NC
cg00043800	LD	NC	NC
cg00043819	NC	NC	NC
cg00043905	NC	NC	NC
cg00043949	NC	NC	NC
cg00044050	NC	NC	NC
cg00044095	NC	NC	NC
cg00044097	NC	NC	NC
cg00044103	NC	NC	NC
cg00044143	NC	NC	NC
cg00044170	NC	NC	NC
cg00044179	NC	NC	NC
cg00044210	NC	NC	NC
cg00044245	NC	LI	NC
cg00044289	NC	NC	NC
cg00044318	NC	NC	NC
cg00044323	NC	NC	NC
cg00044372	NC	NC	NC
cg00044430	NC	NC	NC
cg00044440	NC	NC	NC
cg00044448	LD	LD	LD
cg00044488	NC	NC	NC
cg00044505	NC	NC	NC
cg00044545	NC	NC	NC
cg00044551	NC	NC	NC
cg00044638	NC	NC	NC
cg00044665	NC	NC	NC
cg00044729	NC	NC	NC
cg00044757	NC	NC	NC
cg00044807	NC	NC	NC
cg00044848	NC	NC	NC
cg00044871	NC	NC	NC
cg00044968	NC	NC	NC
cg00044995	NC	NC	NC
cg00045008	NC	NC	NC
cg00045025	NC	NC	NC
cg00045061	NC	NC	NC
cg00045163	NC	NC	NC
cg00045190	NC	NC	NC
cg00045227	NC	NC	NC
cg00045248	NC	NC	NC
cg00045273	NC	NC	NC
cg00045275	NC	NC	NC
cg00045303	NC	NC	NC
cg00045357	NC	NC	NC
cg00045515	NC	NL	NC
cg00045592	NC	NC	NC
cg00045607	NC	NC	NC
cg00045753	NC	NC	NC
cg00045762	NC	NC	NC
cg00045763	NC	NC	NC
cg00045787	NC	NC	NC
cg00045902	NC	NL	NC
cg00045967	NC	NC	NC
cg00046018	NC	NC	NC
cg00046026	NC	NC	NC
cg00046041	NC	NC	NC
cg00046073	NC	NC	NC
cg00046105	NC	NC	NC
cg00046336	NC	NC	NC
cg00046347	NC	NC	NC
cg00046432	NC	NC	NC
cg00046501	NC	NC	NC
cg00046537	NC	NC	NC
cg00046560	NC	NC	NC
cg00046571	NC	NC	NC
cg00046710	NC	NC	NC
cg00046744	NC	NC	NC
cg00046815	NC	NC	NC
cg00046819	NC	NC	NC
cg00046877	LD	LD	LD
cg00046899	NC	NC	NC
cg00046913	NC	NC	NC
cg00046914	NC	NC	NC
cg00046981	NC	NC	NC
cg00046991	NC	NC	NC
cg00047003	NC	NC	NC
cg00047050	LD	NC	NC
cg00047052	NC	NC	NC
cg00047079	NC	NC	NC
cg00047081	NC	NC	NC
cg00047222	NC	NC	NC
cg00047287	NC	NC	NC
cg00047338	NC	NL	NC
cg00047443	NC	NC	NC
cg00047466	NC	NC	NC
cg00047469	NC	NC	NC
cg00047512	NC	NC	NC
cg00047683	NC	NC	NC
cg00047694	NC	NC	NC
cg00047753	NC	NC	NC
cg00047815	NC	NC	NC
cg00047844	NC	NC	NC
cg00047873	NC	NC	NC
cg00047941	NC	NC	NC
cg00048066	NC	NC	NC
cg00048078	NC	NC	NC
cg00048079	NC	NC	NC
cg00048134	NC	NC	NC
cg00048149	NC	NC	NC
cg00048178	NC	NC	NC
cg00048381	NC	NC	NC
cg00048420	NC	NC	NC
cg00048436	NC	NC	NC
cg00048458	NC	NC	NC
cg00048525	NC	NC	NC
cg00048697	NC	NC	NC
cg00048746	NC	NC	NC
cg00048759	LI	LI	LI
cg00048823	NC	NC	NC
cg00048842	NC	NC	NC
cg00048905	NC	NC	NC
cg00048983	NC	NL	NC
cg00049033	NC	NC	NC
cg00049047	LI	LI	NC
cg00049102	NC	NC	NC
cg00049156	NC	NC	NC
cg00049253	NC	NC	NC
cg00049286	NC	NC	NC
cg00049323	NC	NC	NC
cg00049400	NC	NC	NC
cg00049411	NC	NC	NC
cg00049440	NC	NC	NC
cg00049502	NC	NC	NC
cg00049545	NC	NC	NC
cg00049582	NC	NC	NC
cg00049595	LD	NC	NC
cg00049616	NC	NC	NC
cg00049674	NC	NL	NC
cg00049691	NC	NC	NC
cg00049709	NC	NC	NC
cg00049729	NC	NC	NC
cg00049868	NC	NC	NC
cg00049883	NC	NC	NC
cg00049892	NC	NC	NC
cg00049903	NC	NC	NC
cg00049914	NC	NC	NC
cg00049973	NC	NC	NC
cg00049981	NC	NC	NC
cg00050034	NC	NC	NC
cg00050152	NC	NC	NC
cg00050224	NC	NC	NC
cg00050247	NC	NC	NC
cg00050250	NC	NC	NC
cg00050284	NC	NC	NC
cg00050294	NC	NC	NC
cg00050336	NC	NC	NC
cg00050342	NC	NC	NC
cg00050375	NC	NC	NC
cg00050402	NC	NC	NC
cg00050416	NC	NC	NC
cg00050440	NC	NC	NC
cg00050482	NC	NC	NC
cg00050496	NC	NC	NC
cg00050505	NC	NC	NC
cg00050590	NC	NC	NC
cg00050618	NC	NC	NC
cg00050625	NC	NC	NC
cg00050629	NC	NC	NC
cg00050692	LD	NC	NC
cg00050697	NC	NC	NC
cg00050792	NC	NC	NC
cg00050938	NC	NC	NC
cg00050984	NC	NC	NC
cg00051022	NC	NC	NC
cg00051068	NC	NC	NC
cg00051179	NC	NC	NC
cg00051200	NC	NL	NC
cg00051275	NC	NC	NC
cg00051307	NC	NC	NC
cg00051371	NC	NC	NC
cg00051443	NC	NC	NC
cg00051546	NC	NC	NC
cg00051590	NC	NC	NC
cg00051595	NC	NC	NC
cg00051662	NC	NC	NC
cg00051704	NC	NC	NC
cg00051762	NC	NC	NC
cg00051782	NC	NC	NC
cg00051979	NC	NC	NC
cg00052046	NC	NC	NC
cg00052290	NC	NC	NC
cg00052385	NC	NC	NC
cg00052422	NC	NC	NC
cg00052433	NC	NC	NC
cg00052459	NC	NC	NC
cg00052550	NC	NC	NC
cg00052588	NC	NC	NC
cg00052692	NC	NC	NC
cg00052772	NC	NC	NC
cg00052836	NC	NC	NC
cg00052853	NC	NC	NC
cg00052865	NC	NC	NC
cg00052925	NC	NC	NC
cg00052932	LD	NC	NC
cg00052970	NC	NC	NC
cg00053010	NC	NC	NC
cg00053073	NC	NC	NC
cg00053135	NC	NC	NC
cg00053292	NC	NC	NC
cg00053338	NC	NC	NC
cg00053361	NC	NC	NC
cg00053373	NC	NC	NC
cg00053393	NC	NC	NC
cg00053507	NC	NC	NC
cg00053617	NC	NC	NC
cg00053618	NC	NC	NC
cg00053661	NC	NC	NC
cg00053755	NC	NC	NC
cg00053783	NC	NC	NC
cg00053839	NC	NC	NC
cg00053851	NC	NC	NC
cg00053870	NC	NC	NC
cg00053916	NC	NC	NC
cg00053927	NC	NC	NC
cg00053967	NC	NC	NC
cg00054047	LI	LI	NC
cg00054173	NC	NC	NC
cg00054197	NC	NC	NC
cg00054210	NC	NC	NC
cg00054248	NC	NC	NC
cg00054301	NC	NC	NC
cg00054372	NC	NC	NC
cg00054384	NC	NC	NC
cg00054408	NC	NC	NC
cg00054472	NC	NC	NC
cg00054496	NC	NC	NC
cg00054511	NC	NC	NC
cg00054525	NC	NC	NC
cg00054564	NC	NC	NC
cg00054692	NC	NC	NC
cg00054702	NC	NC	NC
cg00054706	NC	NC	NC
cg00054710	NC	NC	NC
cg00054741	NC	NC	NC
cg00054771	NC	NC	NC
cg00054774	NC	NC	NC
cg00054791	NC	NC	NC
cg00055030	NC	NC	NC
cg00055049	NC	NC	NC
cg00055052	NC	NC	NC
cg00055067	NC	NC	NC
cg00055073	NC	NC	NC
cg00055292	LD	NC	NC
cg00055341	NC	NC	NC
cg00055353	NC	NC	NC
cg00055361	NC	NC	NC
cg00055510	NC	NC	NC
cg00055528	NC	NC	NC
cg00055555	NC	NC	NC
cg00055557	NC	NC	NC
cg00055595	NC	NC	NC
cg00055679	LI	LI	LI
cg00055726	NC	NC	NC
cg00055747	NC	NC	NC
cg00055771	NC	NC	NC
cg00055848	NC	NC	NC
cg00055860	NC	NC	NC
cg00055876	NC	NC	NC
cg00055945	LD	NC	NC
cg00055981	NC	NC	NC
cg00055986	NC	NC	NC
cg00056002	NC	NC	NC
cg00056066	NC	NC	NC
cg00056074	NC	NC	NC
cg00056202	NC	NC	NC
cg00056257	NC	NC	NC
cg00056280	NC	NC	NC
cg00056433	NC	NC	NC
cg00056497	NC	NC	NC
cg00056508	NC	NC	NC
cg00056541	NC	NC	NC
cg00056563	NC	NC	NC
cg00056578	NC	NC	NC
cg00056605	NC	NC	NC
cg00056628	NC	NC	NC
cg00056676	NC	NC	NC
cg00056692	LD	LD	NC
cg00056754	NC	NC	NC
cg00056767	NC	NC	NC
cg00056834	NC	NC	NC
cg00056963	NC	NC	NC
cg00056985	NC	NC	NC
cg00057092	NC	NC	NC
cg00057100	NC	NC	NC
cg00057208	NC	NC	NC
cg00057231	VI	NC	NC
cg00057317	NC	NC	NC
cg00057324	NC	NC	NC
cg00057376	NC	NC	NC
cg00057393	NC	NC	NC
cg00057449	NC	NC	NC
cg00057476	NC	NC	NC
cg00057521	NC	NC	NC
cg00057550	NC	NC	NC
cg00057593	NC	NC	NC
cg00057603	NC	NC	NC
cg00057661	NC	NC	NC
cg00057663	NC	NC	NC
cg00057667	NC	NC	NC
cg00057676	NC	NC	NC
cg00057689	NC	NC	NC
cg00057693	NC	NC	NC
cg00057700	NC	NC	NC
cg00057722	NC	NC	NC
cg00057840	NC	NC	NC
cg00057966	NC	NC	NC
cg00058009	NC	NC	NC
cg00058026	NC	NC	NC
cg00058061	NC	NC	NC
cg00058226	NC	NC	NC
cg00058235	NC	NC	NC
cg00058288	NC	NC	NC
cg00058290	NC	NC	NC
cg00058291	NC	NC	NC
cg00058296	NC	NC	NC
cg00058329	NC	NC	NC
cg00058413	NC	NC	NC
cg00058436	NC	NC	NC
cg00058515	NC	NC	NC
cg00058527	NC	NC	NC
cg00058576	NC	NC	NC
cg00058626	NC	NC	NC
cg00058644	NC	NC	NC
cg00058652	NC	NC	NC
cg00058696	NC	NC	NC
cg00058708	NC	NC	NC
cg00058743	NC	NC	NC
cg00058767	NC	NC	NC
cg00058771	NC	NC	NC
cg00058786	NC	NC	NC
cg00058799	NC	NC	NC
cg00058857	NC	NC	NC
cg00058879	NL	NL	NC
cg00058887	NC	NC	NC
cg00058903	NC	NC	NC
cg00058923	NC	NC	NC
cg00058938	NC	NC	NC
cg00059015	NC	NC	NC
cg00059024	NC	NC	NC
cg00059041	LD	NC	LD
cg00059161	NC	NC	NC
cg00059165	NC	NC	NC
cg00059225	LI	LI	LI
cg00059240	NC	NC	NC
cg00059246	VI	VI	VI
cg00059309	NC	NC	NC
cg00059387	NC	NC	NC
cg00059399	NC	NC	NC
cg00059424	NC	NC	NC
cg00059439	NC	NC	NC
cg00059510	NC	NC	NC
cg00059625	NC	NC	NC
cg00059659	NC	NC	NC
cg00059662	NC	LD	NC
cg00059664	NC	NC	NC
cg00059699	NC	NC	NC
cg00059707	NC	NC	NC
cg00059737	NC	NC	NC
cg00059740	NC	NC	NC
cg00059880	NC	NC	NC
cg00059930	NC	NC	NC
cg00059937	NC	NC	NC
cg00059963	NC	NC	NC
cg00060004	NC	NC	NC
cg00060026	LD	NL	LD
cg00060287	NC	NC	NC
cg00060304	NC	NC	NC
cg00060320	NC	NC	NC
cg00060374	NC	NC	NC
cg00060403	NC	NC	NC
cg00060484	NC	NC	NC
cg00060627	NC	NC	NC
cg00060628	NC	NC	NC
cg00060649	NC	NC	NC
cg00060683	NC	NC	NC
cg00060711	NC	NC	NC
cg00060734	NC	NC	NC
cg00060762	NC	NC	NC
cg00060796	NC	NC	NC
cg00060800	LD	NC	NC
cg00060827	NC	NC	NC
cg00060866	NC	NC	NC
cg00060880	NC	NC	NC
cg00060956	NC	NC	NC
cg00061031	NL	NC	NC
cg00061039	NC	NC	NC
cg00061086	NC	NC	NC
cg00061145	NC	NC	NC
cg00061150	NC	NC	NC
cg00061185	NC	NC	NC
cg00061209	NC	NC	NC
cg00061217	NC	NC	NC
cg00061233	NC	NC	NC
cg00061264	NC	NC	NC
cg00061306	NC	NC	NC
cg00061309	NC	NC	NC
cg00061313	NC	NC	NC
cg00061368	NC	NC	NC
cg00061412	NC	NC	NC
cg00061413	NC	NC	NC
cg00061421	NC	NC	NC
cg00061479	NC	NC	NC
cg00061575	NC	NC	NC
cg00061632	NC	NC	NC
cg00061635	NC	NC	NC
cg00061678	NC	NC	NC
cg00061695	NC	NC	NC
cg00061769	NC	NC	NC
cg00061805	NC	NC	NC
cg00061860	NC	NC	NC
cg00061907	NC	NC	NC
cg00061989	NC	NC	NC
cg00062012	NC	NC	NC
cg00062050	NC	NC	NC
cg00062151	NC	NC	NC
cg00062245	LI	LI	NC
cg00062282	NC	NC	NC
cg00062312	NC	NC	NC
cg00062484	NC	NC	NC
cg00062496	NC	NC	NC
cg00062678	NC	NC	NC
cg00062703	NC	NC	NC
cg00062776	NC	NC	NC
cg00062873	NC	NC	NC
cg00063006	NC	NC	NC
cg00063066	NC	NC	NC
cg00063073	LD	LD	LD
cg00063077	NC	NC	NC
cg00063144	NC	NC	NC
cg00063174	NC	NC	NC
cg00063223	NC	NC	NC
cg00063246	NC	NC	NC
cg00063268	NC	NC	NC
cg00063279	NC	NC	NC
cg00063284	NC	NC	NC
cg00063291	NC	NC	NC
cg00063346	NC	NC	NC
cg00063348	NC	NC	NC
cg00063357	NC	NC	NC
cg00063369	NC	NC	NC
cg00063392	NC	NC	NC
cg00063402	NC	NC	NC
cg00063471	NC	NC	NC
cg00063535	NC	NC	NC
cg00063567	NC	NC	NC
cg00063649	NC	NC	NC
cg00063703	NC	NC	NC
cg00063734	NC	NC	NC
cg00063744	NC	NC	NC
cg00063748	LD	LD	NC
cg00063828	NC	NC	NC
cg00063945	NC	NC	NC
cg00063979	NC	NC	NC
cg00063987	NC	NC	NC
cg00064020	LI	NC	NC
cg00064051	NC	NC	NC
cg00064080	NC	NC	NC
cg00064154	NC	NC	NC
cg00064172	NC	NC	NC
cg00064218	NC	NC	NC
cg00064235	NC	NC	NC
cg00064250	NC	NC	NC
cg00064261	NC	LI	NC
cg00064267	NC	NC	NC
cg00064284	NC	NC	NC
cg00064296	NC	NC	NC
cg00064341	LD	LD	LD
cg00064347	NC	NC	NC
cg00064408	NC	NC	NC
cg00064415	NC	NC	NC
cg00064525	NC	NC	NC
cg00064589	NC	NC	NC
cg00064733	LI	LI	NC
cg00064778	NC	NC	NC
cg00064950	NC	NC	NC
cg00064972	NC	NC	NC
cg00065048	LD	NC	NC
cg00065061	NC	NC	NC
cg00065071	NC	NC	NC
cg00065088	NC	NC	NC
cg00065128	NC	NC	NC
cg00065261	NC	NC	NC
cg00065302	NC	NC	NC
cg00065385	NC	NC	NC
cg00065408	NC	NC	NC
cg00065419	NC	NC	NC
cg00065430	NC	NC	NC
cg00065446	NC	NC	NC
cg00065493	NC	NC	NC
cg00065569	NC	NC	NC
cg00065570	NC	NC	NC
cg00065581	NC	NC	NC
cg00065591	NC	NC	NC
cg00065598	LD	LD	LD
cg00065613	NC	NC	NC
cg00065726	NC	NC	NC
cg00065764	NC	NC	NC
cg00065921	NC	NC	NC
cg00065935	LI	LI	LI
cg00065942	NC	NC	NC
cg00065944	LD	LD	LD
cg00065957	NC	NC	NC
cg00066110	NC	NC	NC
cg00066151	NC	NC	NC
cg00066153	NC	NC	NC
cg00066182	NC	NC	NC
cg00066198	NC	NC	NC
cg00066239	NC	NC	NC
cg00066249	NC	NC	NC
cg00066270	NC	NC	NC
cg00066351	NC	NC	NC
cg00066413	NC	NC	NC
cg00066449	NC	NC	NC
cg00066468	NC	NC	NC
cg00066499	NC	NC	NC
cg00066508	NC	NC	NC
cg00066511	NC	LD	NC
cg00066554	NC	NC	NC
cg00066627	NC	NC	NC
cg00066663	NC	NC	NC
cg00066671	NC	NC	NC
cg00066722	NC	NC	NC
cg00066750	NC	NC	NC
cg00066768	NC	NC	NC
cg00066805	NC	NC	NC
cg00066816	NC	NC	NC
cg00066817	NC	NC	NC
cg00066828	NC	NC	NC
cg00066832	LD	NC	NC
cg00066854	NC	NC	NC
cg00066910	LD	NC	NC
cg00066919	NC	NC	NC
cg00066925	NC	NC	NC
cg00067018	NC	LI	NC
cg00067049	NC	NC	NC
cg00067058	NC	NC	NC
cg00067095	NC	NC	NC
cg00067102	NC	NC	NC
cg00067126	NC	NC	NC
cg00067133	NC	NC	NC
cg00067196	NC	NC	NC
cg00067365	NC	NC	NC
cg00067414	NC	NC	NC
cg00067424	NC	NC	NC
cg00067427	NC	NC	NC
cg00067471	NC	NC	NC
cg00067518	NC	NC	NC
cg00067528	NC	NC	NC
cg00067576	NC	NC	NC
cg00067588	NC	NC	NC
cg00067696	NC	NC	NC
cg00067702	NC	NC	NC
cg00067720	NC	NC	NC
cg00067742	NC	NC	NC
cg00067753	NC	NC	NC
cg00067758	NC	NC	NC
cg00067768	NC	NC	NC
cg00067814	NC	NC	NC
cg00067824	NC	NC	NC
cg00067884	NC	NC	NC
cg00067941	NC	NC	NC
cg00068038	NC	NC	NC
cg00068102	NC	NC	NC
cg00068153	NC	NC	NC
cg00068155	NC	NC	NC
cg00068174	NC	NC	NC
cg00068217	NC	NC	NC
cg00068265	NC	NC	NC
cg00068305	NC	NC	NC
cg00068377	NC	NC	NC
cg00068391	NC	NC	NC
cg00068412	NC	NC	NC
cg00068433	NC	NC	NC
cg00068503	NC	NC	NC
cg00068622	NC	NC	NC
cg00068745	LD	LD	NC
cg00068750	NC	NC	NC
cg00068810	NC	NC	NC
cg00068909	NC	NC	NC
cg00069002	LI	LI	NC
cg00069017	NC	NC	NC
cg00069059	NC	NC	NC
cg00069224	NC	NC	NC
cg00069242	LI	LI	LI
cg00069261	NC	NC	NC
cg00069314	NC	NC	NC
cg00069341	NC	NC	NC
cg00069401	NC	NC	NC
cg00069417	NC	NC	NC
cg00069432	NC	NC	NC
cg00069463	NC	NC	NC
cg00069642	NC	NC	NC
cg00069658	NC	NC	NC
cg00069760	NC	NC	NC
cg00069815	NC	NC	NC
cg00069860	NC	NC	NC
cg00069969	NC	NC	NC
cg00070042	NC	NC	NC
cg00070043	NC	NC	NC
cg00070052	NC	NC	NC
cg00070105	NC	NC	NC
cg00070162	NC	NC	NC
cg00070172	NC	NC	NC
cg00070181	NC	NC	NC
cg00070370	NC	NC	NC
cg00070380	LD	NC	NC
cg00070383	NC	NC	NC
cg00070424	NC	NC	NC
cg00070460	NC	NC	NC
cg00070588	NC	NC	NC
cg00070621	NC	NC	NC
cg00070678	NC	NC	NC
cg00070680	NC	NC	NC
cg00070722	NC	NC	NC
cg00070771	NC	NC	NC
cg00070814	NC	NC	NC
cg00070868	NC	NC	NC
cg00070908	NC	NC	NC
cg00070940	NC	NC	NC
cg00071026	NC	NC	NC
cg00071051	NC	NC	NC
cg00071210	NC	NC	NC
cg00071215	NC	NC	NC
cg00071241	NC	NC	NC
cg00071265	NC	NC	NC
cg00071343	NC	NC	NC
cg00071360	NC	NC	NC
cg00071382	NC	NC	NC
cg00071408	NC	NC	NC
cg00071442	NC	NC	NC
cg00071554	NC	NC	NC
cg00071605	NC	NC	NC
cg00071658	NC	NC	NC
cg00071692	NC	NC	NC
cg00071727	NC	NC	NC
cg00071751	NC	NC	NC
cg00071887	NC	NC	NC
cg00071911	NC	NC	NC
cg00071950	NC	NC	NC
cg00071984	NC	NC	NC
cg00071998	NC	NC	NC
cg00072099	NC	NC	NC
cg00072158	NC	NC	NC
cg00072172	NC	NC	NC
cg00072216	NC	NC	NC
cg00072317	NC	NC	NC
cg00072369	NC	NC	NC
cg00072406	NC	NC	NC
cg00072407	NC	NC	NC
cg00072426	NC	NC	NC
cg00072449	NC	NC	NC
cg00072478	NC	NC	NC
cg00072675	NC	NC	NC
cg00072689	NC	NC	NC
cg00072711	NC	NC	NC
cg00072720	LI	LI	LI
cg00072891	NC	NC	NC
cg00072957	NC	NC	NC
cg00073010	NC	NC	NC
cg00073090	LD	NC	NC
cg00073181	NC	NC	NC
cg00073244	NC	NC	NC
cg00073261	NC	NC	NC
cg00073322	NC	NC	NC
cg00073380	NC	NC	NC
cg00073460	NC	NC	NC
cg00073543	NC	NC	NC
cg00073549	NC	NC	NC
cg00073550	NC	NC	NC
cg00073565	NC	NC	NC
cg00073713	NC	NC	NC
cg00073716	NC	NC	NC
cg00073751	NC	NC	NC
cg00073771	NC	NC	NC
cg00073780	NC	NC	NC
cg00073784	NC	NC	NC
cg00073794	NC	NC	NC
cg00073837	LI	LI	NC
cg00073968	NC	NC	NC
cg00073973	NC	NC	NC
cg00074086	NC	NC	NC
cg00074132	NC	NC	NC
cg00074145	NC	NC	NC
cg00074174	NC	NC	VI
cg00074184	NC	NC	NC
cg00074198	NC	NC	NC
cg00074348	NC	NC	NC
cg00074365	NC	NC	NC
cg00074369	NC	NC	NC
cg00074415	NC	NC	NC
cg00074482	NC	NC	NC
cg00074522	NC	NC	NC
cg00074568	NC	NC	NC
cg00074576	NC	NC	NC
cg00074585	NC	NC	NC
cg00074746	NC	NC	NC
cg00074782	NC	NC	NC
cg00074818	LI	NC	NC
cg00074851	NC	NC	NC
cg00075019	NC	NC	NC
cg00075034	NC	NC	NC
cg00075079	NC	NC	NC
cg00075123	NC	NC	NC
cg00075161	NC	NC	NC
cg00075192	NC	NC	NC
cg00075204	NC	NC	NC
cg00075211	NC	NC	NC
cg00075331	NC	NC	NC
cg00075467	NC	NC	NC
cg00075468	NC	NC	NC
cg00075507	NC	NC	NC
cg00075597	LD	LD	LD
cg00075615	NC	NC	NC
cg00075620	NC	NC	NC
cg00075634	NC	NC	NC
cg00075649	NC	NC	NC
cg00075735	NC	NC	NC
cg00075768	NC	NC	NC
cg00075853	NC	NC	NC
cg00075920	NC	NC	NC
cg00075956	NC	NC	NC
cg00075967	NC	NC	NC
cg00075975	NC	NC	NC
cg00076044	NC	NC	NC
cg00076056	NC	NC	NC
cg00076057	NC	NC	NC
cg00076107	NC	NC	NC
cg00076307	NC	NC	NC
cg00076325	NC	NC	NC
cg00076353	NC	NC	NC
cg00076497	NC	NC	NC
cg00076538	NC	NC	NC
cg00076555	NL	NL	NC
cg00076612	NC	NC	NC
cg00076645	NC	NC	NC
cg00076653	LD	NC	NC
cg00076774	NC	NC	NC
cg00076797	NC	NC	NC
cg00076854	NC	NC	NC
cg00076936	NC	NC	NC
cg00076998	NC	NC	NC
cg00077044	NC	NC	NC
cg00077104	NC	NC	NC
cg00077166	NC	NC	NC
cg00077183	NC	NC	NC
cg00077264	NC	NC	NC
cg00077275	NC	NC	NC
cg00077297	NC	NC	NC
cg00077304	NC	NC	NC
cg00077307	NC	NC	NC
cg00077312	NC	NC	NC
cg00077402	NC	NC	NC
cg00077426	NC	NC	NC
cg00077457	NC	NC	NC
cg00077477	NC	NC	NC
cg00077516	NC	NC	NC
cg00077547	NC	NC	NC
cg00077566	NC	NC	NC
cg00077570	LD	NC	NC
cg00077586	NC	NC	NC
cg00077606	NC	NC	NC
cg00077665	NC	NC	NC
cg00077717	NC	NC	NC
cg00077805	NC	NC	NC
cg00077838	NC	NC	NC
cg00077872	NC	NC	NC
cg00077877	NC	NC	NC
cg00077898	NC	NC	NC
cg00077904	NC	NC	NC
cg00078025	NC	NC	NC
cg00078085	NC	NC	NC
cg00078086	NC	NC	NC
cg00078105	LD	NC	NC
cg00078121	NC	NC	NC
cg00078130	NC	NC	NC
cg00078142	NC	NC	NC
cg00078146	NC	NC	NC
cg00078221	NC	NC	NC
cg00078245	LI	NC	NC
cg00078259	NC	NC	NC
cg00078318	NC	NC	NC
cg00078334	NC	NC	NC
cg00078348	NC	NC	NC
cg00078456	NC	NC	NC
cg00078513	NC	NC	NC
cg00078517	NC	NC	NC
cg00078746	NC	NC	NC
cg00078759	NC	NC	NC
cg00078770	NC	NC	NC
cg00078782	NC	NC	NC
cg00078857	NC	NC	NC
cg00078861	NC	NC	NC
cg00078911	NC	NC	NC
cg00078968	NC	NC	NC
cg00078996	NC	NC	NC
cg00079002	NC	NC	NC
cg00079019	NC	NC	NC
cg00079023	NC	NC	NC
cg00079056	NC	NC	NC
cg00079076	NC	NC	NC
cg00079169	NC	NC	NC
cg00079202	NC	NC	NC
cg00079216	NC	NC	NC
cg00079219	NC	NC	NC
cg00079224	NC	NC	NC
cg00079293	NC	NC	NC
cg00079302	NC	NC	NC
cg00079375	NC	NC	NC
cg00079388	NC	NC	NC
cg00079536	NC	NC	NC
cg00079598	NC	NC	NC
cg00079638	NC	NC	NC
cg00079643	NC	NC	NC
cg00079649	NC	NC	NC
cg00079764	NC	NC	NC
cg00079784	NC	NC	NC
cg00079785	NC	NC	NC
cg00079887	NC	NC	NC
cg00079891	NC	NC	NC
cg00080012	NC	NC	NC
cg00080059	NC	NC	NC
cg00080060	NC	NC	NC
cg00080105	NC	NC	NC
cg00080118	NC	NC	NC
cg00080123	NC	NC	NC
cg00080125	NC	NC	NC
cg00080148	NC	NC	NC
cg00080188	LD	LD	NC
cg00080312	NC	NC	NC
cg00080333	NC	NC	NC
cg00080393	NC	NC	NC
cg00080417	NC	NC	NC
cg00080418	NC	NC	NC
cg00080423	NC	NC	NC
cg00080483	LD	LD	NC
cg00080484	NC	NC	NC
cg00080485	NC	NC	NC
cg00080578	NC	NC	NC
cg00080582	NC	NC	NC
cg00080663	NC	NC	NC
cg00080706	NC	NC	NC
cg00080972	NC	NC	NC
cg00080987	NC	NC	NC
cg00081019	NC	NC	NC
cg00081084	NC	NC	NC
cg00081087	NC	NC	NC
cg00081098	NC	NC	NC
cg00081104	NC	NC	NC
cg00081128	NC	LD	NC
cg00081175	LD	NC	NC
cg00081251	NC	NC	NC
cg00081270	NC	NC	NC
cg00081324	LD	LD	LD
cg00081347	NC	NC	NC
cg00081381	NC	NC	NC
cg00081404	NC	NC	NC
cg00081425	NC	NC	NC
cg00081439	NC	NC	NC
cg00081445	NC	NC	NC
cg00081574	NC	NC	NC
cg00081602	NC	NC	NC
cg00081647	NC	NC	NC
cg00081666	NC	NC	NC
cg00081729	NC	NC	NC
cg00081799	NC	NC	NC
cg00081827	NC	NC	NC
cg00081854	NC	NC	NC
cg00081876	NC	NC	NC
cg00081919	NC	NC	NC
cg00081935	NC	NC	NC
cg00081940	NC	NC	NC
cg00081975	NC	NC	NC
cg00082012	NC	NC	NC
cg00082132	NC	NC	NC
cg00082140	NC	NC	NC
cg00082178	NC	NC	NC
cg00082182	NC	NC	NC
cg00082235	NC	NC	NC
cg00082271	LD	NC	NC
cg00082285	NC	NC	NC
cg00082310	NC	NC	NC
cg00082332	NC	NC	NC
cg00082411	NC	NC	NC
cg00082426	NC	NC	NC
cg00082472	NC	NC	NC
cg00082476	NC	NC	NC
cg00082491	NC	NC	NC
cg00082558	NC	NC	NC
cg00082640	NC	NC	NC
cg00082664	NC	NC	NC
cg00082713	NC	NC	NC
cg00082770	NC	NC	NC
cg00082833	NC	NC	NC
cg00082874	NC	NC	NC
cg00082897	NC	NC	NC
cg00082939	NC	NC	NC
cg00082998	LD	NC	NC
cg00083018	NC	NC	NC
cg00083028	NC	NC	NC
cg00083042	NC	NC	NC
cg00083046	NC	NC	NC
cg00083059	NC	NC	NC
cg00083067	NC	NC	NC
cg00083068	NC	NC	NC
cg00083072	NC	NC	NC
cg00083084	NC	NC	NC
cg00083091	NC	NC	NC
cg00083193	NC	NC	NC
cg00083194	NC	NC	NC
cg00083206	NC	NC	NC
cg00083223	NC	NC	NC
[truncated: 554,812+ more rows]
